# Supplementary material for: An updated genetic marker for detection of Lake Sinai Virus and metagenetic applications
Source: PeerJ. 2020 Jul 17;8:e9424. doi: 10.7717/peerj.9424 (PMC7370930; doi:10.7717/peerj.9424)
Supplement: File S5 [file peerj-08-9424-s007.xls]

## Sheet: Sheet1
File S4. Counts of sequence reads mapped to OTUs for each sample. Greyed samples include the negative control and samples that had lower total counts than the negative control. Cells with a value of one were zeroed out to mitigate sample cross-talk, after which OTUs with fewer than 10 total counts were excluded from compositional analysis.
	Column sums prior to zeroing singleton cells->	1571	11626	1864	24	6428	55211	4515	77	74344	41797	22	32956	39605	39349	17144	67675	73282	36774	45562	52820		11	2	2	1	3	4	3	6	5
OTU	rowsums	USGS.CO.135ABD	USGS.CO.225ABD	USGS.CO.225THX	USGS.CO.226ABD	USGS.CO.226THX	USGS.CO.236ABD	USGS.CO.236THX	UNL.H01.008	UNL.H01.009	UNL.H15.010	UNL.H23.001	UNL.LG.121	UNL.VT.250	UNL.VT.250.replicate1	UNL.VT.250.replicate2	USDA.B5.USDA	USDA.C11.USDA	USDA.C2.USDA	USDA.G9.USDA	POSITIVE		NEGATIVE	UNL.H01.009	UNL.H21.001	UNL.H23.006	UNL.H28.002	UNL.LG.120	USGS.CO.123THX	USGS.CO.125ABD	USGS.CO.125THX
OTU:1:2118:14340:11808	89185	1487	5159	5	19	12	0	0	10	6	0	0	30708	174	352	8	50	17	23	141	51014		0	0	0	0	0	0	0	0	0
OTU:1:1111:27295:20283	85772	0	0	0	0	169	0	0	0	28	0	0	11	6	5	0	65248	23	20260	22	0		0	0	0	0	0	0	0	1	0
OTU:1:2111:23502:9796	59187	0	2	2	0	4086	47620	3133	0	0	6	0	0	0	0	0	0	4338	0	0	0		0	0	0	0	0	0	0	0	0
OTU:1:1105:20216:18753	49759	0	3372	1742	0	0	0	0	0	0	0	0	0	0	16	0	0	44591	0	38	0		0	0	0	0	0	0	0	0	0
OTU:1:1101:10087:24595	48773	0	7	0	0	0	0	0	0	0	0	4	94	17825	17236	11963	2	0	0	1604	38		1	0	0	0	0	0	0	0	0
OTU:1:1102:7806:13378	33409	0	0	0	0	2	0	6	39	31905	0	6	92	560	793	4	0	0	0	0	2		0	0	0	0	0	0	0	0	0
OTU:1:1110:28961:13420	29476	0	0	0	0	0	6	0	0	101	29169	0	113	24	63	0	0	0	0	0	0		0	0	0	0	0	0	0	0	0
OTU:1:1107:22482:21202	27197	0	0	0	0	4	0	3	17	26609	38	0	74	135	311	3	0	0	0	3	0		0	0	0	0	0	0	0	0	0
OTU:1:1106:14485:12653	19981	0	0	2	0	0	0	0	3	5	0	0	5	0	0	0	0	0	0	19966	0		0	0	0	0	0	0	0	0	0
OTU:1:1101:5456:8771	12363	0	0	0	0	0	0	0	0	26	0	3	2	3074	4372	2942	0	0	0	1944	0		0	0	0	0	0	0	0	0	0
OTU:1:1109:27242:17016	10253	0	0	0	0	0	2	0	0	55	10126	0	38	8	24	0	0	0	0	0	0		0	0	0	0	0	0	0	0	0
OTU:1:2102:4394:6427	9183	0	0	0	0	0	0	0	0	0	0	0	3	0	0	0	2	0	0	9176	2		0	0	0	0	0	0	0	0	0
OTU:1:2108:21898:8501	7797	0	0	0	0	0	0	0	0	0	0	0	0	0	0	0	0	113	7684	0	0		0	0	0	0	0	0	0	0	0
OTU:1:1101:19403:21249	5846	0	0	0	0	1185	3582	1064	0	0	0	0	0	0	0	0	0	15	0	0	0		0	0	0	0	0	0	0	0	0
OTU:1:1106:13051:6474	4952	0	0	0	0	0	0	0	0	0	0	0	0	2170	2287	159	0	0	0	336	0		0	0	0	0	0	0	0	0	0
OTU:1:1101:17013:16092	4838	0	0	0	0	0	5	0	0	0	0	0	0	0	0	0	0	4833	0	0	0		0	0	0	0	0	0	0	0	0
OTU:1:1112:10663:13632	3792	0	0	0	0	0	0	0	0	0	0	0	4	2149	1469	161	0	0	0	9	0		0	0	0	0	0	0	0	0	0
OTU:1:1103:3216:11509	3531	0	23	0	0	0	0	0	0	0	0	0	0	0	2	0	0	3501	0	5	0		0	0	0	0	0	0	0	0	0
OTU:1:1115:24596:12081	3441	0	0	0	0	0	0	0	0	0	0	0	2	1346	1273	178	0	0	0	642	0		0	0	0	0	0	0	0	0	0
OTU:1:1117:19450:19258	3371	0	0	0	0	0	0	0	0	0	0	0	0	1620	1557	85	0	0	0	109	0		0	0	0	0	0	0	0	0	0
OTU:1:1101:12266:10547	3083	0	0	0	0	0	0	0	0	0	0	0	0	1694	920	15	0	0	0	454	0		0	0	0	0	0	0	0	0	0
OTU:1:1107:18617:12266	2402	6	1989	0	0	0	0	0	0	0	0	0	105	47	58	20	0	0	0	39	138		0	0	0	0	0	0	0	0	0
OTU:1:2117:27769:18011	2288	0	0	0	0	0	0	0	0	0	0	0	0	0	0	0	0	0	2288	0	0		0	0	0	0	0	0	0	0	0
OTU:1:2102:8262:13862	2230	0	13	12	0	0	0	0	0	0	0	0	0	0	0	0	0	2202	0	3	0		0	0	0	0	0	0	0	0	0
OTU:1:1112:8372:18135	1846	0	3	0	0	0	0	0	0	0	0	0	0	0	0	0	0	69	0	1774	0		0	0	0	0	0	0	0	0	0
OTU:1:1107:13246:11715	1802	0	103	67	0	0	0	0	0	0	0	0	0	0	0	0	0	1573	0	59	0		0	0	0	0	0	0	0	0	0
OTU:1:1105:23647:5613	1795	0	0	0	0	0	0	0	0	3	0	0	0	552	796	96	0	0	0	348	0		0	0	0	0	0	0	0	0	0
OTU:1:1101:11245:3754	1703	0	0	0	0	0	0	0	0	0	0	0	0	0	0	0	0	1703	0	0	0		0	0	0	0	0	0	0	0	0
OTU:1:1114:11149:3252	1488	0	0	0	0	0	0	0	0	1479	0	0	0	2	7	0	0	0	0	0	0		0	0	0	0	0	0	0	0	0
OTU:1:1103:24538:21539	1471	0	0	0	0	0	0	0	0	1463	0	0	0	4	4	0	0	0	0	0	0		0	0	0	0	0	0	0	0	0
OTU:1:1104:26822:21177	1378	0	0	0	0	0	0	0	0	0	0	0	0	0	0	0	0	1378	0	0	0		0	0	0	0	0	0	0	0	0
OTU:1:2115:4341:17857	1146	0	0	0	0	0	0	0	0	1141	0	0	0	2	3	0	0	0	0	0	0		0	0	0	0	0	0	0	0	0
OTU:1:1101:10088:16819	1066	0	0	0	0	0	0	0	0	1001	0	0	0	33	32	0	0	0	0	0	0		0	0	0	0	0	0	0	0	0
OTU:1:1113:4647:7070	1012	0	0	0	0	0	0	0	0	0	1007	0	0	0	5	0	0	0	0	0	0		0	0	0	0	0	0	0	0	0
OTU:1:1119:7766:19082	1001	0	0	0	0	0	0	0	0	0	0	0	0	0	0	0	0	1001	0	0	0		0	0	0	0	0	0	0	0	0
OTU:1:1101:10142:13706	989	0	43	0	0	0	0	0	0	0	0	0	0	0	4	0	0	7	0	935	0		0	0	0	0	0	0	0	0	0
OTU:1:2103:9470:21891	936	0	0	0	0	0	0	0	0	0	0	0	0	619	300	6	0	0	0	11	0		0	0	0	0	0	0	0	0	0
OTU:1:1101:13481:19574	920	0	0	0	0	0	0	0	0	883	0	0	0	8	29	0	0	0	0	0	0		0	0	0	0	0	0	0	0	0
OTU:1:1104:6844:19812	909	0	0	0	0	0	0	0	0	862	0	0	2	19	24	0	0	0	0	2	0		0	0	0	0	0	0	0	0	0
OTU:1:1101:25323:9631	872	0	0	0	0	0	0	0	0	0	0	0	0	0	0	0	0	872	0	0	0		0	0	0	0	0	0	0	0	0
OTU:1:1101:10367:9129	848	0	0	0	0	0	0	0	0	0	0	0	0	357	319	10	0	0	0	162	0		0	0	0	0	0	0	0	0	0
OTU:1:2101:15362:9904	736	0	0	0	0	0	0	0	0	0	0	0	0	0	0	0	0	0	0	736	0		0	0	0	0	0	0	0	0	0
OTU:1:1106:25983:17463	704	0	0	0	0	0	0	0	0	0	0	0	0	11	8	0	0	0	0	685	0		0	0	0	0	0	0	0	0	0
OTU:1:1102:12843:8874	686	0	3	2	0	0	0	0	0	0	0	0	0	0	0	0	0	676	0	5	0		0	0	0	0	0	0	0	0	0
OTU:1:1105:26876:5138	676	0	0	0	0	0	0	0	0	671	0	0	0	0	5	0	0	0	0	0	0		0	0	0	0	0	0	0	0	0
OTU:1:1101:22963:10931	656	0	0	0	0	0	0	0	0	0	0	0	0	271	321	47	0	0	0	17	0		0	0	0	0	0	0	0	0	0
OTU:1:2106:22766:21336	631	0	0	0	0	0	0	0	0	0	0	0	0	6	8	2	0	0	0	615	0		0	0	0	0	0	0	0	0	0
OTU:1:1118:9060:24278	626	0	0	0	0	0	0	0	0	9	0	0	0	0	0	0	126	0	491	0	0		0	0	0	0	0	0	0	0	0
OTU:1:1114:18359:7755	613	0	0	0	0	0	0	0	0	583	0	0	4	12	14	0	0	0	0	0	0		0	0	0	0	0	0	0	0	0
OTU:1:1103:2468:13013	612	0	0	0	0	5	0	0	0	0	0	0	0	0	0	0	467	0	140	0	0		0	0	0	0	0	0	0	0	0
OTU:1:1115:8933:24290	577	0	0	0	0	0	0	0	0	512	0	0	0	21	44	0	0	0	0	0	0		2	0	0	0	0	0	0	0	0
OTU:1:2103:13739:17671	572	0	0	0	0	0	0	0	0	0	0	0	0	370	162	24	0	0	0	16	0		0	0	0	0	0	0	0	0	0
OTU:1:2103:22928:16832	567	0	0	0	0	0	0	0	0	0	0	0	0	258	193	27	0	0	0	89	0		0	0	0	0	0	0	0	0	0
OTU:1:1101:14813:6401	565	0	0	0	0	0	0	0	0	0	0	0	0	0	0	0	0	0	565	0	0		0	0	0	0	0	0	0	0	1
OTU:1:2103:26172:13709	560	0	0	0	0	0	0	0	0	544	5	0	2	5	4	0	0	0	0	0	0		0	0	0	0	0	0	0	0	0
OTU:1:1107:27421:7675	555	20	36	0	0	0	0	0	0	0	0	0	260	0	2	0	0	0	0	2	235		0	0	0	0	0	0	0	0	0
OTU:1:1101:17403:18619	525	0	0	0	0	0	0	0	0	0	0	0	0	308	160	4	0	0	0	53	0		0	0	0	0	0	0	0	0	0
OTU:1:1105:18553:5271	522	0	0	0	0	0	0	0	0	0	0	0	0	259	233	23	0	0	0	7	0		0	0	0	0	0	0	0	0	0
OTU:1:1116:25214:11186	521	0	0	0	0	0	0	0	0	0	0	0	0	222	191	25	0	0	0	83	0		0	0	0	0	0	0	0	0	0
OTU:1:1107:16499:23294	515	0	0	0	0	0	0	0	0	0	0	0	0	0	0	0	0	0	515	0	0		0	0	0	0	0	0	0	0	0
OTU:1:1108:22678:7493	513	0	0	0	0	0	0	0	0	494	0	0	0	8	11	0	0	0	0	0	0		0	0	0	0	0	0	0	0	0
OTU:1:1102:11292:21736	506	0	0	0	0	0	0	0	0	0	0	0	5	87	88	22	0	0	0	304	0		0	0	0	0	0	0	0	0	0
OTU:1:2101:16019:9679	499	0	0	0	0	0	0	0	0	0	0	0	0	194	200	101	0	0	0	4	0		0	0	0	0	0	0	0	0	0
OTU:1:2115:26398:16019	498	0	0	0	0	0	0	0	0	0	490	0	4	2	2	0	0	0	0	0	0		0	0	0	0	0	0	0	0	0
OTU:1:1101:11881:17573	491	0	2	0	0	0	0	0	0	0	0	0	0	0	2	0	0	0	0	487	0		0	0	0	0	0	0	0	0	0
OTU:1:1106:4778:19593	487	0	0	0	0	0	0	0	0	0	0	0	0	156	227	39	0	0	0	65	0		0	0	0	0	0	0	0	0	0
OTU:1:2108:12230:16971	463	0	0	0	0	0	0	0	0	459	0	0	0	0	4	0	0	0	0	0	0		0	0	0	0	0	0	0	0	0
OTU:1:1101:13031:16319	461	0	0	0	0	0	0	0	0	0	0	0	0	278	180	3	0	0	0	0	0		0	0	0	0	0	0	0	0	0
OTU:1:2104:19837:18712	453	0	0	0	0	0	0	0	0	0	0	0	0	198	200	11	0	0	0	44	0		0	0	0	0	0	0	0	0	0
OTU:1:1104:28058:16912	450	0	0	0	0	0	0	0	0	0	0	0	0	0	0	0	2	0	448	0	0		0	0	0	0	0	0	0	0	0
OTU:1:1101:17046:19307	448	0	0	0	0	279	128	28	0	0	0	0	0	0	0	0	0	13	0	0	0		0	0	0	0	0	0	0	0	0
OTU:1:1101:11919:24670	444	0	0	0	0	0	0	0	0	0	0	0	0	0	0	0	0	444	0	0	0		0	0	0	0	0	0	0	0	0
OTU:1:1102:10425:11942	444	0	0	0	0	0	0	0	0	0	0	0	0	197	132	13	0	0	0	102	0		0	0	0	0	0	0	0	0	0
OTU:1:1101:10721:22289	436	0	23	0	0	0	0	0	0	0	0	0	0	199	154	10	0	2	0	48	0		0	0	0	0	0	0	0	0	0
OTU:1:2106:18450:11499	435	4	0	0	0	0	0	0	0	0	0	0	20	142	133	66	0	0	0	65	5		1	0	0	0	0	0	0	0	0
OTU:1:1103:14279:10606	434	0	0	0	0	0	0	0	0	0	0	0	0	215	153	10	0	0	0	56	0		0	0	0	0	0	0	0	0	0
OTU:1:1110:7627:23172	407	0	0	0	0	0	0	0	0	388	0	0	2	11	6	0	0	0	0	0	0		0	0	0	0	0	0	0	0	0
OTU:1:1103:27223:5744	386	0	13	0	0	0	0	0	0	0	0	0	105	48	41	33	0	0	0	34	112		0	0	0	0	0	0	0	0	0
OTU:1:2115:25109:23145	381	0	0	0	0	0	0	0	0	0	0	0	0	0	0	0	0	0	381	0	0		0	0	0	0	0	0	0	0	0
OTU:1:2108:24131:22040	371	0	0	0	0	38	277	22	0	0	0	0	0	0	0	0	0	34	0	0	0		0	0	0	0	0	0	0	0	0
OTU:1:2107:14950:23839	370	0	31	2	0	0	0	0	0	0	0	0	0	0	0	0	0	337	0	0	0		0	0	0	0	0	0	0	0	0
OTU:1:1101:10427:15551	357	0	0	0	0	0	0	0	0	344	0	0	0	5	8	0	0	0	0	0	0		0	0	0	0	0	0	0	0	0
OTU:1:1101:19213:23458	347	0	0	0	0	0	0	0	0	0	0	0	0	0	0	0	0	347	0	0	0		0	0	0	0	0	0	0	0	0
OTU:1:1103:5528:13789	337	0	0	0	0	262	53	9	0	0	0	0	0	0	0	0	0	13	0	0	0		0	0	0	0	0	0	0	0	0
OTU:1:1104:19591:11005	334	0	0	0	0	0	0	0	0	0	0	0	0	0	0	0	0	309	25	0	0		0	0	0	0	0	0	0	0	0
OTU:1:1114:9065:6811	332	0	0	0	0	0	0	0	0	0	0	0	0	0	0	0	0	332	0	0	0		0	0	0	0	0	0	0	0	0
OTU:1:1114:12566:19579	324	0	0	0	0	0	0	0	0	313	0	0	0	7	4	0	0	0	0	0	0		0	0	0	0	0	0	0	0	0
OTU:1:2118:28990:13712	316	0	7	0	0	0	0	0	0	0	0	0	0	0	0	0	0	309	0	0	0		0	0	0	0	0	0	0	0	0
OTU:1:1105:28357:10611	315	0	0	0	0	0	0	0	0	0	182	0	0	68	52	2	0	0	0	11	0		0	0	0	0	0	0	0	0	0
OTU:1:2101:22968:22611	314	0	0	0	0	0	0	0	0	0	0	0	0	111	132	65	0	0	0	6	0		0	0	0	0	0	0	0	0	0
OTU:1:2103:5017:18489	312	0	0	0	0	0	0	0	0	0	0	0	0	0	0	0	0	0	0	312	0		0	0	0	0	0	0	0	0	0
OTU:1:1108:13476:11472	303	0	0	0	0	0	0	0	0	0	0	0	0	0	0	0	242	0	61	0	0		0	0	0	0	0	0	0	0	0
OTU:1:1101:20622:19162	303	2	6	0	0	0	0	0	0	0	0	0	22	87	81	40	0	0	0	43	22		0	0	0	0	0	0	0	0	0
OTU:1:1101:28326:17758	301	6	30	0	0	0	0	0	0	0	0	0	171	0	0	0	0	0	0	0	94		0	0	0	0	0	0	0	0	0
OTU:1:2117:3926:15949	299	0	0	0	0	41	228	7	0	0	0	0	0	0	0	0	0	23	0	0	0		0	0	0	0	0	0	0	0	0
OTU:1:1101:6070:6806	298	0	0	0	0	0	0	0	0	3	2	0	0	100	128	0	0	0	0	65	0		0	0	0	0	0	0	0	0	0
OTU:1:1107:23446:17896	292	0	0	0	0	16	218	14	0	0	0	0	0	0	0	0	0	44	0	0	0		0	0	0	0	0	0	0	0	0
OTU:1:1108:26832:11850	291	0	0	0	0	0	0	0	0	0	0	0	0	0	0	0	0	3	288	0	0		0	0	0	0	0	0	0	0	0
OTU:1:2108:26898:6073	289	0	0	0	0	0	0	0	0	0	0	0	0	0	0	0	2	9	278	0	0		0	0	0	0	0	0	0	0	0
OTU:1:1106:13094:24264	286	0	0	0	0	0	0	0	0	79	0	0	2	6	41	0	120	0	38	0	0		0	0	0	0	0	0	0	0	0
OTU:1:1101:13645:24579	285	0	0	0	0	0	0	0	0	0	0	0	0	107	105	3	0	0	0	70	0		0	0	0	0	0	0	0	0	0
OTU:1:2106:20967:22237	279	0	0	0	0	0	0	0	0	0	0	0	0	0	0	0	0	2	277	0	0		0	0	0	0	0	0	0	0	0
OTU:1:1104:23236:13307	276	0	0	0	0	0	0	0	0	0	0	0	0	0	0	0	0	276	0	0	0		0	0	0	0	0	0	0	0	0
OTU:1:1105:14861:17034	276	0	0	0	0	24	217	9	0	0	0	0	0	0	0	0	0	26	0	0	0		0	0	0	0	0	0	0	0	0
OTU:1:1111:11535:24366	275	0	0	0	0	0	0	0	0	275	0	0	0	0	0	0	0	0	0	0	0		0	0	0	0	0	0	0	0	0
OTU:1:1105:4051:16268	272	0	0	0	0	0	0	0	0	0	0	0	0	0	0	0	0	0	272	0	0		0	0	0	0	0	0	0	0	0
OTU:1:1118:27786:17912	268	0	0	0	0	0	0	0	0	0	0	0	0	0	0	0	211	0	57	0	0		0	0	0	0	0	0	0	0	0
OTU:1:1107:20821:17790	267	0	22	0	0	0	0	0	0	0	0	0	194	0	3	0	0	3	0	0	45		0	0	0	0	0	0	0	0	0
OTU:1:1117:4964:8325	266	3	7	0	0	0	0	0	0	0	0	0	73	4	4	2	0	0	0	6	167		0	0	0	0	0	0	0	0	0
OTU:1:1111:10481:20159	265	0	0	0	0	0	0	0	0	0	0	0	0	0	0	0	0	0	265	0	0		0	0	0	0	0	0	0	0	0
OTU:1:1101:13459:18371	264	0	0	0	0	0	0	0	0	0	0	0	0	0	0	0	0	264	0	0	0		0	0	0	0	0	0	0	0	0
OTU:1:1101:12187:16973	259	0	0	0	0	0	0	0	0	0	0	0	0	0	0	0	0	0	0	259	0		0	0	0	0	0	0	0	0	0
OTU:1:1111:18698:6497	257	0	0	0	0	0	0	0	0	0	0	0	0	0	0	0	194	0	63	0	0		0	0	0	0	0	0	0	0	0
OTU:1:1110:12948:13614	254	0	0	0	0	0	0	0	0	249	0	0	0	3	2	0	0	0	0	0	0		0	0	0	0	0	0	0	0	0
OTU:1:1108:18052:20237	252	0	0	0	0	0	0	0	0	249	0	0	0	0	3	0	0	0	0	0	0		0	0	0	0	0	0	0	0	0
OTU:1:1110:11117:20920	250	0	0	0	0	0	0	0	0	0	0	0	0	94	85	63	0	0	0	8	0		0	0	0	0	0	0	0	0	0
OTU:1:1103:14246:15229	249	0	0	0	0	25	194	8	0	0	0	0	0	0	0	0	0	22	0	0	0		0	0	0	0	0	0	0	0	0
OTU:1:1106:22316:22052	240	0	0	0	0	13	203	4	0	0	0	0	0	0	0	0	0	20	0	0	0		0	0	0	0	0	0	0	0	0
OTU:1:1114:9707:22040	233	4	17	0	0	0	0	0	0	0	0	0	86	0	2	0	0	0	0	3	121		0	0	0	0	0	0	0	0	0
OTU:1:1104:22111:9525	231	0	139	2	0	0	0	0	0	0	0	0	0	0	0	0	0	86	0	4	0		0	0	0	0	0	0	0	0	0
OTU:1:1105:22966:21041	231	0	0	0	0	0	0	0	0	45	182	0	2	0	2	0	0	0	0	0	0		0	0	0	0	0	0	0	0	0
OTU:1:2111:8102:14062	231	0	0	0	0	0	0	0	0	0	0	0	0	93	80	44	0	0	0	14	0		0	0	0	0	0	0	0	0	0
OTU:1:1105:20772:8432	229	0	0	0	0	0	0	0	0	216	0	0	5	6	2	0	0	0	0	0	0		0	0	0	0	0	0	0	0	0
OTU:1:1116:21892:18636	226	0	0	0	0	0	0	0	0	0	0	0	0	93	101	12	0	0	0	20	0		0	0	0	0	0	0	0	0	0
OTU:1:2104:10238:20390	223	0	0	0	0	10	77	7	0	0	0	0	0	0	0	0	0	129	0	0	0		0	0	0	0	0	0	0	0	0
OTU:1:1103:22013:7514	223	0	0	0	0	0	0	0	0	220	0	0	0	0	3	0	0	0	0	0	0		0	0	0	0	0	0	0	0	0
OTU:1:1108:21936:7559	221	0	0	0	0	0	0	0	0	0	0	0	9	19	89	0	79	7	18	0	0		0	0	0	0	0	0	0	0	0
OTU:1:1113:28290:13747	216	0	0	0	0	0	0	0	0	199	0	0	0	8	9	0	0	0	0	0	0		0	0	0	0	0	0	0	0	0
OTU:1:1104:10854:15471	214	0	0	0	0	0	0	0	0	0	0	0	0	0	0	0	168	0	46	0	0		0	0	0	0	0	0	0	0	0
OTU:1:1102:7692:8643	214	0	0	0	0	0	0	0	0	0	0	0	0	0	0	0	0	0	214	0	0		0	0	0	0	0	0	0	0	0
OTU:1:2115:5380:7701	213	0	0	0	0	0	0	0	0	0	0	0	0	66	81	55	0	0	0	11	0		0	0	0	0	0	0	0	0	0
OTU:1:1115:21862:8282	209	0	0	0	0	0	0	0	0	0	0	0	0	0	0	0	175	0	34	0	0		0	0	0	0	0	0	0	0	0
OTU:1:1104:27644:16643	209	0	0	0	0	0	0	0	0	0	0	0	0	83	86	34	0	0	0	6	0		0	0	0	0	0	0	0	0	0
OTU:1:1101:17643:23036	206	0	0	0	0	0	0	0	0	0	0	0	0	73	133	0	0	0	0	0	0		0	0	0	0	0	0	0	0	0
OTU:1:1105:13715:9388	202	0	12	4	0	0	0	0	0	0	0	0	0	0	0	0	0	179	0	7	0		0	0	0	0	0	0	0	0	0
OTU:1:1107:6223:15801	198	3	5	0	0	0	0	0	0	0	0	0	83	2	2	0	0	0	0	13	90		0	0	0	0	0	0	0	0	0
OTU:1:1106:11210:5007	196	0	0	0	0	0	0	0	0	0	0	0	0	0	0	0	140	0	56	0	0		0	0	0	0	0	0	0	0	0
OTU:1:1103:24800:10423	184	0	0	0	0	0	0	0	0	0	0	0	0	0	0	0	136	0	48	0	0		0	0	0	0	0	0	0	0	0
OTU:1:2101:12955:13014	182	0	0	0	0	0	0	0	0	0	0	0	0	0	0	0	0	182	0	0	0		0	0	0	0	0	0	1	0	0
OTU:1:1110:5077:18219	179	0	0	0	0	0	0	0	0	29	0	0	0	61	70	5	0	0	0	14	0		0	0	0	0	0	0	0	0	0
OTU:1:1102:28882:14055	178	0	0	0	0	0	0	0	0	0	0	0	0	0	2	0	0	0	0	176	0		0	0	0	0	0	0	0	0	0
OTU:1:1102:13744:10772	177	0	0	0	0	0	0	0	0	0	0	0	0	47	89	39	0	0	0	2	0		0	0	0	0	0	0	0	0	0
OTU:1:2118:17894:22945	176	0	0	0	0	11	135	8	0	0	0	0	0	0	0	0	0	22	0	0	0		0	0	0	0	0	0	0	0	0
OTU:1:1101:10725:18737	176	0	0	0	0	0	0	0	0	0	0	0	0	0	0	0	0	0	0	176	0		0	0	0	0	0	0	0	0	0
OTU:1:1115:9099:11112	175	0	0	0	0	0	0	0	0	148	0	0	0	11	16	0	0	0	0	0	0		0	0	0	0	0	0	0	0	0
OTU:1:2101:22342:10047	172	0	2	0	0	0	0	0	0	0	0	0	0	0	0	0	0	170	0	0	0		0	0	0	0	0	0	0	0	0
OTU:1:1104:9357:8179	172	0	0	0	0	0	0	0	0	0	0	0	0	49	76	44	0	0	0	3	0		0	0	0	0	0	0	0	0	0
OTU:1:1119:15098:14298	171	0	6	0	0	0	0	0	0	0	0	0	0	0	0	0	0	156	0	9	0		0	0	0	0	0	0	0	0	0
OTU:1:1101:10849:11091	168	0	0	0	0	0	0	0	0	0	0	0	0	0	0	0	0	168	0	0	0		0	0	0	0	0	0	0	0	0
OTU:1:2117:22098:14385	168	0	0	0	0	12	133	7	0	0	0	0	0	0	0	0	0	16	0	0	0		0	0	0	0	0	0	0	0	0
OTU:1:1110:26962:21201	166	2	14	0	0	0	0	0	0	0	0	0	76	3	2	0	0	0	0	2	67		0	0	0	0	0	0	0	0	0
OTU:1:1101:26537:7700	164	2	3	0	0	0	0	0	0	0	0	0	35	0	0	0	0	0	0	6	118		0	0	0	0	0	0	0	0	0
OTU:1:2119:23200:18745	164	0	0	0	0	0	0	0	0	0	0	0	0	61	66	34	0	0	0	3	0		0	0	0	0	0	0	0	0	0
OTU:1:1102:19924:10287	163	0	0	0	0	0	0	0	0	0	0	0	0	73	82	5	0	0	0	3	0		0	0	0	0	0	0	0	0	0
OTU:1:1105:23013:9372	162	0	0	0	0	0	0	0	0	0	0	0	0	0	0	0	112	0	50	0	0		0	0	0	0	0	0	0	0	0
OTU:1:1117:25579:22327	162	0	0	0	0	11	132	6	0	0	0	0	0	0	0	0	0	13	0	0	0		0	0	0	0	0	0	0	0	0
OTU:1:1118:7514:21702	160	0	0	0	0	12	124	7	0	0	0	0	0	0	0	0	0	17	0	0	0		0	0	0	0	0	0	0	0	0
OTU:1:1108:8761:15908	158	0	0	0	0	0	0	0	0	0	0	0	0	0	0	0	0	0	0	158	0		0	0	0	0	0	0	0	0	0
OTU:1:1107:22816:21550	157	0	0	0	0	0	0	0	0	0	0	0	0	89	57	0	0	0	0	11	0		0	0	0	0	0	0	0	0	0
OTU:1:1102:9449:14303	156	0	0	0	0	0	0	0	0	0	0	0	0	57	63	27	0	0	0	9	0		0	0	0	0	0	0	0	0	0
OTU:1:1101:10196:18358	155	0	0	0	0	0	0	0	0	0	0	0	0	0	0	0	0	155	0	0	0		0	0	0	0	0	0	0	0	0
OTU:1:1101:13841:9552	155	0	0	0	0	0	0	0	0	0	0	0	0	0	0	0	0	0	155	0	0		0	0	0	0	0	0	0	0	0
OTU:1:1102:11149:4299	154	0	0	0	0	13	122	5	0	0	0	0	0	0	0	0	0	14	0	0	0		0	0	0	0	0	0	0	0	0
OTU:1:1102:19622:14916	154	0	80	0	0	0	0	0	0	0	0	0	0	0	4	0	0	0	0	70	0		0	0	0	0	0	0	0	0	0
OTU:1:1104:3573:19169	153	0	10	0	0	0	0	0	0	0	0	0	47	0	0	0	0	0	0	0	96		0	0	0	0	0	0	0	0	0
OTU:1:2116:26619:16426	151	0	0	0	0	0	0	0	0	0	0	0	0	51	71	6	0	0	0	23	0		0	0	0	0	0	0	0	0	0
OTU:1:1101:18919:19617	150	0	16	7	0	0	0	0	0	0	0	0	0	0	0	0	0	127	0	0	0		0	0	0	0	0	0	0	0	0
OTU:1:1117:2539:8710	150	0	0	0	0	0	0	0	0	0	0	0	0	0	0	0	0	150	0	0	0		0	0	0	0	0	0	0	0	0
OTU:1:2116:10999:9889	150	0	0	0	0	6	104	16	0	0	0	0	0	0	0	0	0	24	0	0	0		0	0	0	0	0	0	0	0	0
OTU:1:1101:15478:10256	150	0	0	0	0	0	0	0	0	137	0	0	0	4	9	0	0	0	0	0	0		0	0	0	0	0	0	0	0	0
OTU:1:2110:19800:12305	149	0	0	0	0	0	0	0	0	0	0	0	0	58	59	25	0	0	0	7	0		0	0	0	0	0	0	0	0	0
OTU:1:1111:24634:13310	149	0	0	0	0	0	0	0	0	0	0	0	0	50	62	37	0	0	0	0	0		0	0	0	0	0	0	0	0	0
OTU:1:1101:7769:13406	148	0	0	0	0	5	116	8	0	0	0	0	0	0	0	0	0	19	0	0	0		0	0	0	0	0	0	0	0	0
OTU:1:2116:4603:15953	145	0	0	0	0	0	0	0	0	145	0	0	0	0	0	0	0	0	0	0	0		0	0	0	0	0	0	0	0	0
OTU:1:1111:4125:13870	144	0	0	0	0	22	104	8	0	0	0	0	0	0	0	0	0	10	0	0	0		0	0	0	0	0	0	0	0	0
OTU:1:1107:6732:6255	144	0	0	0	0	10	106	19	0	0	0	0	0	0	0	0	0	9	0	0	0		0	0	0	0	0	0	0	0	0
OTU:1:1111:26859:5781	144	0	0	0	0	0	0	0	0	0	0	0	4	44	91	0	0	0	0	5	0		0	0	0	0	0	0	0	0	0
OTU:1:2106:14283:16510	143	0	0	0	0	0	0	0	0	0	0	0	0	0	2	0	0	0	141	0	0		0	0	0	0	0	0	0	0	0
OTU:1:1103:2812:17512	143	0	0	0	0	0	0	0	0	0	143	0	0	0	0	0	0	0	0	0	0		0	0	0	0	0	0	0	0	0
OTU:1:1117:6921:4581	143	0	0	0	0	0	0	0	0	131	0	0	4	3	5	0	0	0	0	0	0		0	0	0	0	0	0	0	0	0
OTU:1:1101:28760:17728	142	0	0	0	0	0	0	0	0	0	0	0	0	0	0	0	0	0	142	0	0		0	0	0	0	0	0	0	0	0
OTU:1:1115:20179:14560	142	0	13	3	0	0	0	0	0	0	0	0	0	0	0	0	0	115	0	11	0		0	0	0	0	0	0	0	0	0
OTU:1:1104:15276:20440	142	0	0	0	0	0	0	0	0	0	0	0	0	52	63	20	0	0	0	7	0		0	0	0	0	0	0	0	0	0
OTU:1:2106:11511:12888	141	0	0	0	0	0	0	0	0	0	0	0	0	56	43	30	0	0	0	12	0		0	0	0	0	0	0	0	0	0
OTU:1:1119:6204:4990	139	0	0	0	0	0	0	0	0	0	0	0	0	0	0	0	0	139	0	0	0		0	0	0	0	0	0	0	0	0
OTU:1:1112:18694:19510	137	0	0	0	0	15	99	4	0	0	0	0	0	0	0	0	0	19	0	0	0		0	0	0	0	0	0	0	0	0
OTU:1:1102:16128:15318	135	0	0	0	0	0	0	0	0	0	0	0	0	0	0	0	0	0	135	0	0		0	0	0	0	0	0	0	0	0
OTU:1:1101:21742:11541	134	0	0	0	0	0	0	0	0	0	0	0	0	0	0	0	0	0	0	134	0		0	0	0	0	0	0	0	0	0
OTU:1:1102:9613:6194	134	0	0	0	0	0	0	0	0	0	0	0	0	5	9	0	0	0	0	120	0		0	0	0	0	0	0	0	0	0
OTU:1:1103:24385:14848	134	0	82	0	0	0	0	0	0	0	0	0	9	7	24	0	2	10	0	0	0		0	0	0	0	0	0	0	0	0
OTU:1:1101:14834:13941	133	0	0	0	0	0	0	0	0	0	0	0	0	0	2	0	0	4	127	0	0		0	0	0	0	0	0	0	0	0
OTU:1:1103:5138:11080	133	0	0	0	0	0	0	0	0	0	0	0	0	49	53	29	0	0	0	2	0		0	0	0	0	0	0	0	0	0
OTU:1:2116:7013:22659	132	0	7	0	0	0	0	0	0	0	0	0	0	0	0	0	0	121	0	4	0		0	0	0	0	0	0	0	0	0
OTU:1:2112:19900:10887	131	0	0	0	0	17	79	8	0	0	0	0	0	0	0	0	0	27	0	0	0		0	0	0	0	0	0	0	0	0
OTU:1:1102:6463:10637	130	0	0	0	0	0	0	0	0	0	0	0	0	0	0	0	0	0	0	130	0		0	0	0	0	0	0	0	0	0
OTU:1:1110:5519:19162	129	0	0	0	0	0	0	0	0	119	0	0	0	6	4	0	0	0	0	0	0		0	0	0	0	0	0	0	0	0
OTU:1:2107:15788:13784	128	0	0	0	0	0	0	0	0	0	0	0	0	0	0	0	0	128	0	0	0		0	0	0	0	0	0	0	0	0
OTU:1:1118:16903:15257	127	0	47	0	0	0	0	0	0	0	0	0	56	2	2	0	0	0	0	2	18		0	0	0	0	0	0	0	0	0
OTU:1:1101:16462:8225	126	0	0	0	0	4	113	3	0	0	0	0	0	0	0	0	0	6	0	0	0		0	0	0	0	0	0	0	0	0
OTU:1:1107:15001:4986	126	0	0	0	0	0	0	0	0	0	0	0	0	2	8	0	11	0	105	0	0		0	0	0	0	0	0	0	0	0
OTU:1:1102:19161:22063	125	0	0	0	0	0	0	0	0	0	0	0	0	43	54	2	0	0	0	26	0		0	0	0	0	0	0	0	0	0
OTU:1:1103:27230:7354	124	2	7	0	0	0	0	0	0	0	0	0	43	0	0	0	0	0	0	0	72		0	0	0	0	0	0	0	0	0
OTU:1:1101:13557:23367	124	0	0	0	0	0	0	0	0	0	0	0	0	0	0	0	0	0	0	124	0		0	0	0	0	0	0	0	0	0
OTU:1:1103:28252:12523	123	0	0	0	0	11	97	3	0	0	0	0	0	0	0	0	0	12	0	0	0		0	0	0	0	0	0	0	0	0
OTU:1:1117:22708:20494	122	0	0	0	0	0	0	0	0	0	0	0	0	0	0	0	0	0	0	122	0		0	0	0	0	0	0	0	0	0
OTU:1:1106:21576:16337	121	0	0	0	0	0	0	0	0	0	0	0	0	49	52	18	0	0	0	2	0		0	0	0	0	0	0	0	0	0
OTU:1:2116:20638:9040	121	0	0	0	0	0	0	0	0	0	0	0	3	32	51	30	0	0	0	5	0		0	0	0	0	0	0	0	0	0
OTU:1:1101:26897:19098	120	0	4	0	0	0	0	0	0	0	0	0	53	2	0	0	0	0	0	5	56		0	0	0	0	0	0	0	0	0
OTU:1:1111:26856:5823	120	4	5	0	0	0	0	0	0	0	0	0	39	0	0	0	0	0	0	0	72		0	0	0	0	0	0	0	0	0
OTU:1:1103:10573:20239	120	0	0	0	0	0	0	0	0	0	0	0	0	80	28	0	0	0	0	12	0		0	0	0	0	0	0	0	0	0
OTU:1:1101:2613:17996	119	0	0	0	0	0	0	0	0	119	0	0	0	0	0	0	0	0	0	0	0		0	0	2	0	0	0	0	0	3
OTU:1:1105:20592:20825	119	0	0	0	0	9	79	4	0	0	0	0	0	0	0	0	0	27	0	0	0		0	0	0	0	0	0	0	0	0
OTU:1:1102:4711:13731	117	0	0	0	0	0	0	0	0	0	0	0	0	58	49	0	0	0	0	10	0		0	0	0	0	0	0	0	0	0
OTU:1:1105:6366:6655	116	0	0	0	0	3	98	7	0	0	0	0	0	0	0	0	0	8	0	0	0		0	0	0	0	0	0	0	0	0
OTU:1:2115:14515:16592	115	0	0	0	0	0	0	0	0	93	0	0	0	0	22	0	0	0	0	0	0		0	0	0	0	0	0	0	0	0
OTU:1:1106:15746:13590	115	0	0	0	0	0	0	0	0	0	0	0	0	38	42	25	0	0	0	10	0		0	0	0	0	0	0	0	0	0
OTU:1:1113:17374:13257	113	0	0	0	0	0	0	0	0	0	0	0	0	46	53	12	0	0	0	2	0		0	0	0	0	0	0	0	0	0
OTU:1:1103:3704:8367	110	0	0	0	0	0	0	0	0	91	0	0	0	2	5	3	0	0	0	9	0		0	0	0	0	0	0	0	0	0
OTU:1:2116:9097:20842	110	0	0	0	0	0	0	0	0	0	0	0	0	0	0	0	0	8	100	2	0		0	0	0	0	0	0	0	0	0
OTU:1:1105:28142:17401	110	0	0	0	0	0	0	0	0	106	0	0	0	0	4	0	0	0	0	0	0		0	0	0	0	0	0	0	0	0
OTU:1:2115:4046:14614	110	0	0	0	0	0	0	0	0	0	0	0	48	8	4	4	0	0	0	22	24		2	0	0	0	1	0	0	0	0
OTU:1:1118:18899:12534	107	0	0	0	0	0	0	0	0	104	0	0	0	3	0	0	0	0	0	0	0		0	0	0	0	0	0	0	0	0
OTU:1:1119:20588:18064	106	0	98	0	0	0	0	0	0	0	0	0	0	0	0	0	0	5	0	3	0		0	0	0	0	0	0	0	0	0
OTU:1:1106:27163:9390	105	0	0	0	0	0	0	0	0	0	0	0	0	0	0	0	0	0	0	105	0		0	0	0	0	0	0	0	0	0
OTU:1:2115:6502:3522	103	0	0	0	0	0	0	0	0	0	0	0	0	36	41	22	0	0	0	4	0		0	0	0	0	0	0	0	0	0
OTU:1:1101:17576:20801	102	0	0	0	0	0	0	0	0	102	0	0	0	0	0	0	0	0	0	0	0		0	0	0	0	0	0	0	0	0
OTU:1:2103:23424:7840	102	0	0	0	0	0	0	0	0	0	0	0	0	28	36	38	0	0	0	0	0		0	0	0	0	0	0	0	0	0
OTU:1:1116:17079:7501	101	0	0	0	0	0	0	0	0	0	0	0	0	0	0	0	0	101	0	0	0		0	0	0	0	0	0	0	0	0
OTU:1:1106:15875:3841	101	0	0	0	0	0	0	0	0	0	0	0	0	36	43	18	0	0	0	4	0		0	0	0	0	0	0	0	0	0
OTU:1:1101:11463:24811	100	0	0	0	0	0	0	0	0	0	0	0	0	54	41	0	0	0	0	5	0		0	0	0	0	0	0	0	0	0
OTU:1:1108:23663:12164	96	0	0	0	0	0	0	0	0	0	0	0	0	0	0	0	0	0	0	96	0		0	0	0	0	0	0	0	0	0
OTU:1:1104:9867:23291	95	0	0	0	0	0	0	0	0	0	0	0	0	0	0	0	0	86	9	0	0		0	0	0	0	0	0	0	0	0
OTU:1:1106:8695:2705	94	0	0	0	0	3	72	7	0	0	0	0	0	0	0	0	0	12	0	0	0		0	0	0	0	0	0	0	0	0
OTU:1:1101:24356:7338	93	0	0	0	0	0	0	0	0	93	0	0	0	0	0	0	0	0	0	0	0		0	0	0	0	0	0	0	0	0
OTU:1:1105:4493:5495	91	0	6	0	0	0	0	0	0	0	0	0	16	0	4	0	0	0	0	61	4		0	0	0	0	0	0	0	0	0
OTU:1:1108:6312:20663	91	0	0	0	0	0	0	0	0	0	0	0	0	31	39	18	0	0	0	3	0		0	0	0	0	0	0	0	0	0
OTU:1:1101:11883:8895	90	0	0	0	0	0	0	0	0	90	0	0	0	0	0	0	0	0	0	0	0		0	0	0	0	0	0	0	0	0
OTU:1:1103:19844:16734	90	0	0	0	0	0	0	0	0	0	0	0	0	0	0	0	0	90	0	0	0		0	0	0	0	0	0	0	0	0
OTU:1:2109:27629:12199	89	0	0	0	0	0	0	0	0	0	0	0	0	42	36	0	0	0	0	11	0		0	0	0	0	0	0	0	0	0
OTU:1:2111:13165:20138	88	0	0	0	0	0	0	0	0	16	72	0	0	0	0	0	0	0	0	0	0		0	0	0	0	0	0	0	0	0
OTU:1:2103:6949:13853	87	0	0	0	0	0	0	0	0	84	0	0	3	0	0	0	0	0	0	0	0		0	0	0	0	0	0	0	0	0
OTU:1:1101:18382:14972	87	0	0	0	0	0	0	0	0	87	0	0	0	0	0	0	0	0	0	0	0		0	0	0	0	0	0	0	0	0
OTU:1:1109:6881:3386	87	0	0	0	0	7	49	25	0	0	0	0	0	0	0	0	0	6	0	0	0		0	0	0	0	0	0	0	0	0
OTU:1:1106:24707:8317	87	0	0	0	0	0	0	0	0	0	0	0	0	12	15	10	0	0	0	50	0		0	0	0	0	0	0	0	0	0
OTU:1:1106:8313:16869	86	0	0	0	0	0	0	0	0	0	0	0	0	28	43	3	0	0	0	12	0		0	0	0	0	0	0	0	0	0
OTU:1:1101:24315:17201	86	0	0	0	0	0	0	0	0	10	0	0	0	34	24	7	0	0	0	11	0		0	0	0	0	0	0	0	0	0
OTU:1:2105:5793:14655	86	0	0	0	0	0	0	0	0	23	2	0	0	21	24	10	0	0	0	6	0		0	0	0	0	0	0	0	0	0
OTU:1:1108:19089:9718	84	0	0	0	0	0	0	0	0	0	0	0	0	0	0	0	0	84	0	0	0		0	0	0	0	0	0	0	0	0
OTU:1:1111:25792:18406	83	0	0	0	0	7	65	4	0	0	0	0	0	0	0	0	0	7	0	0	0		0	0	0	0	0	0	0	0	0
OTU:1:1110:14029:6740	83	2	8	0	0	0	0	0	0	0	0	0	35	0	2	0	0	0	0	0	36		0	0	0	0	0	0	0	0	0
OTU:1:1113:14311:3852	83	0	0	0	0	0	0	0	0	80	0	0	0	0	3	0	0	0	0	0	0		0	0	0	0	0	0	0	0	0
OTU:1:1113:3177:11070	82	0	0	0	0	0	0	0	0	0	0	0	0	0	0	0	0	0	82	0	0		0	0	0	0	0	0	0	0	0
OTU:1:2107:27453:13432	82	2	6	0	0	0	0	0	0	0	0	0	33	0	0	0	0	0	0	2	39		0	0	0	0	0	0	0	0	0
OTU:1:1111:26272:9826	81	0	0	0	0	0	0	0	0	0	0	0	0	27	34	9	0	0	0	11	0		0	0	0	0	0	0	0	0	0
OTU:1:2101:12498:20230	80	0	0	0	0	0	0	0	0	0	0	0	0	0	0	0	0	0	80	0	0		0	0	0	0	0	0	0	0	0
OTU:1:2111:11144:21131	80	0	0	0	0	0	0	0	0	0	0	0	0	33	38	5	0	0	0	4	0		0	0	0	0	0	0	0	0	0
OTU:1:1103:7898:9725	77	0	0	0	0	0	0	0	0	51	24	0	0	0	0	0	0	0	0	2	0		0	0	0	0	0	0	0	0	0
OTU:1:1114:13195:19809	77	0	19	0	0	0	0	0	0	0	0	0	0	0	2	0	0	0	0	56	0		0	0	0	0	0	0	0	0	0
OTU:1:1101:10688:21701	77	0	0	0	0	0	0	0	0	73	0	0	0	0	4	0	0	0	0	0	0		0	0	0	0	0	0	0	0	0
OTU:1:1101:14709:21548	77	0	0	0	0	0	0	0	0	0	0	0	5	25	47	0	0	0	0	0	0		0	0	0	0	0	0	0	0	0
OTU:1:1105:5970:8345	76	0	0	0	0	0	0	0	0	2	0	0	0	0	0	0	64	0	10	0	0		0	0	0	0	0	0	0	0	0
OTU:1:2102:27718:16452	76	0	0	0	0	0	0	0	0	70	0	0	0	3	3	0	0	0	0	0	0		0	0	0	0	0	0	0	0	0
OTU:1:1101:12831:18953	73	0	0	0	0	0	0	0	0	0	0	0	0	0	0	0	0	0	0	73	0		0	0	0	0	0	0	0	0	0
OTU:1:1113:25037:13653	71	0	0	0	0	5	45	6	0	0	0	0	0	0	0	0	0	15	0	0	0		0	0	0	0	0	0	0	0	0
OTU:1:2116:17522:16577	71	0	0	0	0	0	0	0	0	62	0	0	0	4	3	0	0	0	0	2	0		0	0	0	0	0	0	0	0	0
OTU:1:1101:28206:15059	69	0	0	0	0	0	0	0	0	0	0	0	0	0	0	0	0	0	0	69	0		0	0	0	0	0	0	0	0	0
OTU:1:2101:23982:15428	68	0	0	0	0	0	0	0	0	0	0	0	0	0	0	0	0	0	0	68	0		0	0	0	0	0	0	0	0	0
OTU:1:1116:26877:16962	68	0	0	0	0	0	53	2	0	0	0	0	0	0	0	0	0	13	0	0	0		0	0	0	0	0	0	0	0	0
OTU:1:1101:14023:15788	68	0	0	0	0	0	0	0	0	0	0	0	0	0	0	0	0	0	68	0	0		0	0	0	0	0	0	0	0	0
OTU:1:2107:14795:11215	67	0	0	0	0	8	49	4	0	0	0	0	0	0	0	0	0	6	0	0	0		0	0	0	0	0	0	0	0	0
OTU:1:1107:28668:14420	67	0	0	0	0	0	0	0	0	4	0	0	0	15	32	9	0	0	0	7	0		0	0	0	0	0	0	0	0	0
OTU:1:1102:10779:19286	66	0	0	0	0	0	0	0	0	0	0	0	0	19	28	13	0	0	0	6	0		0	0	0	0	0	0	0	0	0
OTU:1:2107:8410:4993	65	0	0	0	0	6	46	2	0	0	0	0	0	0	0	0	0	11	0	0	0		0	0	0	0	0	0	0	0	0
OTU:1:1101:15315:14242	65	0	0	0	0	0	0	0	0	0	0	0	0	0	0	0	0	0	0	65	0		0	0	0	0	0	0	0	0	0
OTU:1:1101:20837:7175	65	0	0	0	0	0	0	0	0	63	0	0	0	2	0	0	0	0	0	0	0		0	0	0	0	0	0	0	0	0
OTU:1:1106:7591:20391	65	0	0	0	0	0	0	0	0	0	0	0	3	32	22	0	0	0	0	6	2		0	0	0	0	0	0	0	0	0
OTU:1:1109:25937:19114	64	0	0	0	0	8	54	2	0	0	0	0	0	0	0	0	0	0	0	0	0		0	0	0	0	0	0	0	0	0
OTU:1:1103:22749:18079	64	0	0	0	0	0	0	0	0	0	0	0	0	0	0	0	0	0	64	0	0		0	0	0	0	0	0	0	0	0
OTU:1:2104:26402:6158	63	0	0	0	0	2	44	5	0	0	0	0	0	0	0	0	0	12	0	0	0		0	0	0	0	0	0	0	0	0
OTU:1:2102:7659:14366	63	0	0	0	0	5	49	6	0	0	0	0	0	0	0	0	0	3	0	0	0		1	0	0	0	0	0	0	1	0
OTU:1:2105:20946:20275	63	0	0	0	0	0	0	0	0	0	0	0	0	13	10	5	0	0	0	35	0		0	0	0	0	0	0	0	0	0
OTU:1:1102:28231:9601	61	0	0	0	0	0	0	0	0	59	0	0	0	2	0	0	0	0	0	0	0		0	0	0	0	0	0	0	0	0
OTU:1:2111:27072:21345	59	0	0	0	0	0	0	0	0	0	0	0	0	0	0	0	0	0	0	59	0		0	0	0	0	0	0	0	0	0
OTU:1:2105:18274:17256	59	0	0	0	0	0	0	0	0	0	0	0	0	0	0	0	0	0	59	0	0		0	0	0	0	0	0	0	0	0
OTU:1:1110:20841:7868	59	0	0	0	0	0	0	0	0	0	0	0	0	0	0	0	0	0	0	59	0		0	0	0	0	0	0	0	0	0
OTU:1:1110:26303:13858	59	0	0	0	0	0	0	0	0	0	0	0	0	0	0	0	0	59	0	0	0		0	0	0	0	0	0	0	0	0
OTU:1:2110:27164:6040	59	0	0	0	0	0	0	0	0	0	0	0	0	20	31	8	0	0	0	0	0		0	0	0	0	0	0	0	0	0
OTU:1:1101:13900:15676	58	0	7	0	0	0	0	0	0	0	0	0	0	0	0	0	0	51	0	0	0		0	0	0	0	0	0	0	0	0
OTU:1:1105:2203:14238	58	0	0	0	0	0	0	0	0	0	0	0	0	24	22	10	0	0	0	2	0		0	0	0	0	0	0	0	0	0
OTU:1:1110:21831:10693	57	0	0	0	0	0	0	0	0	2	55	0	0	0	0	0	0	0	0	0	0		0	0	0	0	0	0	0	0	0
OTU:1:1102:24154:15141	55	0	0	0	0	0	0	0	0	0	0	0	0	0	0	0	0	0	0	55	0		0	0	0	0	0	0	0	0	0
OTU:1:1107:23978:20559	55	0	0	0	0	0	0	0	0	0	0	0	0	0	0	0	0	55	0	0	0		0	0	0	0	0	0	0	0	0
OTU:1:1103:23538:4207	55	0	0	0	0	0	0	0	0	0	0	0	0	35	20	0	0	0	0	0	0		0	0	0	0	0	0	0	0	0
OTU:1:1103:25838:6560	54	0	0	0	0	0	0	0	0	0	0	0	0	0	2	0	0	0	0	52	0		0	0	0	0	0	0	0	0	0
OTU:1:1101:10550:21856	54	0	0	0	0	0	0	0	0	0	0	0	0	0	7	0	0	0	0	47	0		0	0	0	0	0	0	0	0	0
OTU:1:1101:27186:6373	53	0	0	0	0	6	38	7	0	0	0	0	0	0	0	0	0	2	0	0	0		0	0	0	0	0	0	0	0	0
OTU:1:1102:11160:13782	53	0	3	2	0	0	0	0	0	0	0	0	0	0	0	0	0	42	0	6	0		0	0	0	0	0	0	0	0	0
OTU:1:1103:2347:11912	53	5	3	0	0	0	0	0	0	0	0	0	25	0	0	0	0	0	0	0	20		0	0	0	0	0	0	0	0	0
OTU:1:1107:11897:10914	53	0	0	0	0	0	0	0	0	0	53	0	0	0	0	0	0	0	0	0	0		0	0	0	0	0	0	0	0	0
OTU:1:1116:21990:23757	53	0	0	0	0	5	44	4	0	0	0	0	0	0	0	0	0	0	0	0	0		0	0	0	0	0	0	0	0	0
OTU:1:2105:5607:10649	51	0	0	0	0	0	0	0	0	51	0	0	0	0	0	0	0	0	0	0	0		0	0	0	0	0	0	0	0	0
OTU:1:2102:7462:20942	51	0	0	0	0	0	0	0	0	0	0	0	0	0	0	0	0	51	0	0	0		0	0	0	0	0	0	0	0	0
OTU:1:1101:9164:19919	51	0	0	0	0	0	0	0	0	0	0	0	0	24	19	4	0	0	0	4	0		0	0	0	0	0	0	0	0	0
OTU:1:1102:22705:16738	50	0	0	0	0	0	0	0	0	50	0	0	0	0	0	0	0	0	0	0	0		0	0	0	0	0	0	0	0	0
OTU:1:2101:6524:16843	50	0	0	0	0	0	0	0	0	0	48	0	0	0	2	0	0	0	0	0	0		0	0	0	0	0	0	0	0	0
OTU:1:1111:5110:6951	49	0	0	0	0	0	0	0	0	0	0	0	0	29	18	0	0	0	0	2	0		0	0	0	0	0	0	0	0	0
OTU:1:1106:12299:6081	49	0	0	0	0	0	0	0	0	26	0	0	0	4	11	3	0	0	0	5	0		0	0	0	0	0	0	0	0	0
OTU:1:1102:22026:22738	48	0	0	0	0	0	0	0	0	0	0	0	0	2	0	0	0	0	0	46	0		0	0	0	0	0	0	0	0	0
OTU:1:1115:29140:10005	48	0	0	0	0	0	0	0	0	0	0	0	0	13	24	11	0	0	0	0	0		0	0	0	0	0	0	0	0	0
OTU:1:1109:27323:5836	45	0	0	0	0	0	0	0	0	0	0	0	21	0	0	0	0	0	0	0	24		0	0	0	0	0	0	0	0	0
OTU:1:1101:26833:16645	45	0	0	0	0	0	0	0	0	33	0	0	0	7	5	0	0	0	0	0	0		0	0	0	0	0	0	0	0	0
OTU:1:1112:23170:15179	45	0	0	0	0	0	0	0	0	0	31	0	0	5	2	4	0	0	0	3	0		0	0	0	0	0	0	0	0	0
OTU:1:1107:7193:3293	45	0	0	0	0	0	0	0	0	12	0	0	0	7	14	5	0	0	0	7	0		0	0	0	0	0	0	0	0	0
OTU:1:2106:14147:7381	45	0	0	0	0	0	0	0	0	0	0	0	0	25	10	7	0	0	0	3	0		0	0	0	0	0	0	0	0	0
OTU:1:2111:14953:12592	45	0	0	0	0	0	0	0	0	0	0	0	0	13	21	11	0	0	0	0	0		0	0	0	0	0	0	0	0	0
OTU:1:1102:20283:8557	44	0	0	0	0	0	0	0	0	0	0	0	0	0	0	0	0	0	44	0	0		0	0	0	0	0	0	0	0	0
OTU:1:1115:28331:10512	44	0	0	0	0	0	0	0	0	0	0	0	0	29	13	0	0	2	0	0	0		0	0	0	0	0	0	0	0	0
OTU:1:1101:15036:10088	43	0	0	0	0	0	0	0	0	43	0	0	0	0	0	0	0	0	0	0	0		0	0	0	0	0	0	0	0	0
OTU:1:1103:25280:15535	43	0	0	0	0	0	0	0	0	0	0	0	0	0	0	0	0	0	0	43	0		0	0	0	0	0	0	0	0	0
OTU:1:1101:19770:19235	42	0	0	0	0	0	0	0	0	0	0	0	0	0	0	0	0	0	42	0	0		0	0	0	0	0	0	0	0	0
OTU:1:1101:13349:11117	41	0	0	0	0	0	0	0	0	0	0	0	0	5	0	0	0	0	0	36	0		0	0	0	0	0	0	0	0	0
OTU:1:1110:17171:17183	41	0	0	0	0	0	0	0	0	0	0	0	0	0	0	0	0	0	0	41	0		0	0	0	0	0	0	0	0	0
OTU:1:1116:22829:5561	41	0	0	0	0	0	0	0	0	0	0	0	0	17	19	0	0	0	0	5	0		0	0	0	0	0	0	0	0	0
OTU:1:1101:15626:11195	41	0	0	0	0	0	0	0	0	0	0	0	0	11	30	0	0	0	0	0	0		0	0	0	0	0	0	0	0	0
OTU:1:1101:10015:20836	40	0	0	0	0	0	0	0	0	0	0	0	0	0	0	0	0	40	0	0	0		0	0	0	0	0	0	0	0	0
OTU:1:2110:6401:22753	40	0	0	0	0	0	0	0	0	0	0	0	0	17	23	0	0	0	0	0	0		0	0	0	0	0	0	0	0	0
OTU:1:1101:21382:11282	39	0	0	0	0	0	0	0	0	0	0	0	0	0	0	0	0	0	39	0	0		0	0	0	0	1	0	0	2	1
OTU:1:1101:10612:23205	38	0	0	0	0	0	0	0	0	0	0	0	0	0	0	0	0	0	38	0	0		0	0	0	0	0	0	0	0	0
OTU:1:1106:9865:22262	38	0	0	0	0	0	0	0	0	0	0	0	0	0	0	0	0	0	38	0	0		0	0	0	0	0	0	0	0	0
OTU:1:1103:21816:8246	38	0	0	0	0	0	0	0	0	34	0	0	0	2	2	0	0	0	0	0	0		0	0	0	0	0	0	0	0	0
OTU:1:1103:17750:11866	37	0	0	0	0	0	30	0	0	0	0	0	0	0	0	0	0	7	0	0	0		0	0	0	0	0	0	0	0	0
OTU:1:1102:4911:13382	37	0	17	0	0	0	0	0	0	0	0	0	0	0	2	0	0	0	2	16	0		0	0	0	0	0	0	0	0	0
OTU:1:2102:5555:7920	37	0	0	0	0	0	0	0	0	0	0	0	0	4	3	2	0	0	0	28	0		0	0	0	0	0	0	0	0	0
OTU:1:1112:26346:19667	36	0	0	0	0	0	0	0	0	0	0	0	0	0	0	0	0	0	0	36	0		0	0	0	0	0	0	0	0	0
OTU:1:1111:5189:18514	36	0	0	0	0	0	0	0	0	0	0	0	0	0	0	0	0	36	0	0	0		0	0	0	0	0	0	0	0	0
OTU:1:1102:24595:9951	36	0	0	0	0	0	0	0	0	0	0	0	0	5	16	5	0	0	0	10	0		0	0	0	0	0	0	0	0	0
OTU:1:1107:5772:9857	35	0	0	0	0	0	0	0	0	0	0	0	0	0	0	0	26	0	9	0	0		0	0	0	0	0	0	0	0	0
OTU:1:1103:26166:12748	35	0	0	0	0	0	0	0	0	0	0	0	0	0	0	0	0	0	35	0	0		0	0	0	0	0	0	0	0	0
OTU:1:1113:10620:6899	35	0	0	0	0	0	0	0	0	0	0	0	0	0	0	0	0	0	0	35	0		0	0	0	0	0	0	0	0	0
OTU:1:1116:21883:5273	35	0	0	0	0	0	0	0	0	0	35	0	0	0	0	0	0	0	0	0	0		0	0	0	0	0	0	0	0	0
OTU:1:1103:14263:7239	35	0	0	0	0	0	0	0	0	0	0	0	0	7	2	0	0	0	0	26	0		0	0	0	0	0	0	0	0	0
OTU:1:1104:6351:17163	35	0	0	0	0	0	0	0	0	0	0	0	7	12	16	0	0	0	0	0	0		0	0	0	0	0	0	0	0	0
OTU:1:2103:26439:20649	35	0	0	0	0	0	0	0	0	0	0	0	2	11	20	0	0	0	0	2	0		0	0	0	0	0	0	0	0	0
OTU:1:1102:4932:11214	35	0	0	0	0	0	0	0	0	0	0	0	2	11	22	0	0	0	0	0	0		0	0	0	0	0	0	0	0	0
OTU:1:1109:22633:7598	35	0	0	0	0	0	0	0	0	0	0	0	0	20	10	5	0	0	0	0	0		0	0	0	0	0	0	0	0	0
OTU:1:1104:21139:16867	34	0	0	0	0	0	0	0	0	34	0	0	0	0	0	0	0	0	0	0	0		0	0	0	0	0	0	0	0	0
OTU:1:1112:24806:22075	34	0	0	0	0	0	0	0	0	0	0	0	0	0	0	0	0	0	0	34	0		0	0	0	0	0	0	0	0	0
OTU:1:1119:17935:21240	34	0	0	0	0	0	0	0	0	0	0	0	0	0	0	0	0	34	0	0	0		0	0	0	0	0	0	0	0	0
OTU:1:1101:12785:11536	33	0	0	0	0	0	0	0	0	0	0	0	0	0	0	0	0	0	0	33	0		0	0	0	0	0	0	0	0	0
OTU:1:1101:14575:9243	33	0	0	0	0	0	0	0	0	0	0	0	0	0	0	0	0	0	0	33	0		0	0	0	0	0	0	0	0	0
OTU:1:1104:24423:19562	33	0	0	0	0	0	0	0	0	0	0	0	0	0	0	0	0	0	33	0	0		0	0	0	0	0	0	0	0	0
OTU:1:1106:3826:15342	33	0	0	0	0	0	0	0	0	0	3	0	0	10	10	6	0	0	0	4	0		0	0	0	0	0	0	0	0	0
OTU:1:2118:23856:6910	32	2	3	0	0	0	0	0	0	0	0	0	11	0	0	0	0	0	0	0	16		0	0	0	0	0	0	0	0	0
OTU:1:1114:15272:12243	32	0	0	0	0	0	0	0	0	0	0	0	0	0	0	0	0	32	0	0	0		0	0	0	0	0	0	0	0	0
OTU:1:1105:24229:14125	32	0	0	0	0	0	0	0	0	0	0	0	0	0	0	0	0	0	0	32	0		0	0	0	0	0	0	0	0	0
OTU:1:1106:18156:24018	32	0	0	0	0	0	0	0	0	26	0	0	0	2	4	0	0	0	0	0	0		0	0	0	0	0	0	0	0	0
OTU:1:1101:17261:12449	32	0	0	0	0	0	0	0	0	0	0	0	0	23	7	0	0	0	0	2	0		0	0	0	0	0	0	0	0	0
OTU:1:1101:14482:12790	31	0	0	0	0	0	0	0	0	31	0	0	0	0	0	0	0	0	0	0	0		0	0	0	0	0	0	0	0	0
OTU:1:2101:23156:14811	31	0	0	0	0	4	21	2	0	0	0	0	0	0	0	0	0	4	0	0	0		0	0	0	0	0	0	0	0	0
OTU:1:2101:21818:17471	31	0	0	0	0	0	0	0	0	0	0	0	0	17	14	0	0	0	0	0	0		0	0	0	0	0	0	0	0	0
OTU:1:1101:22779:16557	31	0	0	0	0	0	0	0	0	0	0	0	0	12	13	3	0	0	0	3	0		0	0	0	0	0	0	0	0	0
OTU:1:1101:3074:12994	31	0	0	0	0	0	0	0	0	0	0	0	0	5	17	4	0	0	0	5	0		0	0	0	0	0	0	0	0	0
OTU:1:1104:20445:23850	31	0	0	0	0	0	0	0	0	0	0	0	0	3	21	5	0	0	0	2	0		0	0	0	0	0	0	0	0	0
OTU:1:1101:11379:20069	30	0	0	0	0	0	0	0	0	30	0	0	0	0	0	0	0	0	0	0	0		0	0	0	0	0	0	0	0	0
OTU:1:1108:26714:21264	30	0	0	0	0	4	26	0	0	0	0	0	0	0	0	0	0	0	0	0	0		0	0	0	0	0	0	0	0	0
OTU:1:1103:5785:16639	30	0	0	0	0	0	0	0	0	0	0	0	0	15	13	0	0	0	0	2	0		0	0	0	0	0	0	0	1	0
OTU:1:1105:27151:11612	30	0	0	0	0	0	0	0	0	0	0	0	3	12	13	0	0	0	0	2	0		0	0	0	0	0	0	0	0	0
OTU:1:1119:13987:16109	30	0	0	0	0	0	0	0	0	0	0	0	0	6	22	2	0	0	0	0	0		0	0	0	0	0	0	0	0	0
OTU:1:1109:27969:17343	29	0	0	0	0	4	25	0	0	0	0	0	0	0	0	0	0	0	0	0	0		0	0	0	0	0	0	0	0	0
OTU:1:1101:19806:18991	29	0	0	0	0	0	0	0	0	0	0	0	0	0	0	0	0	19	10	0	0		0	0	0	0	0	0	0	0	0
OTU:1:1105:10959:16388	29	0	0	0	0	0	0	0	0	0	0	0	0	10	19	0	0	0	0	0	0		0	0	0	0	0	0	0	0	0
OTU:1:2111:27064:19254	29	0	0	0	0	0	0	0	0	0	0	0	0	17	10	2	0	0	0	0	0		0	0	0	0	0	0	0	0	0
OTU:1:2102:15322:4982	28	0	0	0	0	0	0	0	0	28	0	0	0	0	0	0	0	0	0	0	0		0	0	0	0	0	0	0	0	0
OTU:1:2110:26644:15255	28	0	0	0	0	0	0	0	0	0	28	0	0	0	0	0	0	0	0	0	0		0	0	0	0	0	0	0	0	0
OTU:1:1101:18149:7726	28	0	0	0	0	0	0	0	0	0	0	0	0	0	0	0	0	28	0	0	0		0	0	0	0	0	0	0	0	0
OTU:1:1102:10056:23242	28	0	0	0	0	0	0	0	0	28	0	0	0	0	0	0	0	0	0	0	0		0	0	0	0	0	0	0	0	0
OTU:1:1105:9900:17932	28	0	0	0	0	0	0	0	0	0	0	0	0	0	0	0	0	0	28	0	0		0	0	0	0	0	0	0	0	0
OTU:1:1107:7505:4644	28	0	0	0	0	0	0	0	0	0	0	0	0	0	0	0	0	0	0	28	0		0	0	0	0	0	0	0	0	0
OTU:1:2115:11226:17709	28	0	0	0	0	0	0	0	0	0	0	0	0	0	0	0	0	0	28	0	0		0	0	0	0	0	0	0	0	0
OTU:1:1101:7757:5888	28	0	0	0	0	0	0	0	0	0	0	0	0	5	18	0	0	0	0	5	0		0	0	0	0	0	0	0	0	0
OTU:1:1101:16211:14098	28	0	0	0	0	0	0	0	0	0	0	0	0	7	21	0	0	0	0	0	0		0	0	0	0	0	0	0	0	0
OTU:1:1101:24975:9340	27	0	0	0	0	0	0	0	0	0	0	0	0	16	9	0	0	0	0	2	0		0	0	0	0	0	0	0	0	0
OTU:1:1111:27434:5841	26	0	0	0	0	0	0	0	0	0	0	0	14	0	0	0	0	0	0	0	12		0	0	0	0	0	0	0	0	0
OTU:1:1115:24688:15982	26	0	0	0	0	0	0	0	0	26	0	0	0	0	0	0	0	0	0	0	0		0	0	0	0	0	0	0	0	0
OTU:1:1106:27260:5847	26	0	0	0	0	0	0	0	0	0	0	0	0	0	0	0	23	0	3	0	0		0	0	0	0	0	0	0	0	0
OTU:1:1104:19314:8747	26	0	0	0	0	0	0	0	0	0	0	0	0	16	5	0	0	0	0	5	0		0	0	0	0	0	0	0	0	0
OTU:1:1108:16509:12725	26	0	0	0	0	0	0	0	0	0	0	0	0	18	6	0	0	0	0	2	0		0	0	0	0	0	0	0	0	0
OTU:1:1109:7895:8629	26	0	0	0	0	0	0	0	0	0	0	0	0	15	11	0	0	0	0	0	0		0	0	0	0	0	0	0	0	0
OTU:1:1102:18045:7925	26	0	0	0	0	0	0	0	0	0	0	0	0	6	9	4	0	0	0	7	0		0	0	0	0	0	0	0	0	0
OTU:1:2103:24796:22196	25	0	23	0	0	0	0	0	0	0	0	0	0	0	0	0	0	2	0	0	0		0	0	0	0	0	0	0	0	0
OTU:1:1111:5988:18222	25	0	0	0	0	0	0	0	0	0	0	0	0	0	0	0	0	25	0	0	0		0	0	0	0	0	0	0	0	0
OTU:1:1115:9411:14178	25	0	0	0	0	0	0	0	0	0	0	0	0	0	0	0	0	0	0	25	0		0	0	0	0	0	0	0	0	0
OTU:1:2113:24919:5975	25	0	0	0	0	0	0	0	0	0	0	0	0	0	0	0	0	25	0	0	0		0	0	0	0	0	0	0	0	0
OTU:1:1113:4797:5155	25	0	0	0	0	0	0	0	0	0	0	0	0	10	13	0	2	0	0	0	0		0	0	0	0	0	0	0	0	0
OTU:1:1112:2955:18071	25	0	0	0	0	0	0	0	0	0	0	0	0	5	13	7	0	0	0	0	0		0	0	0	0	0	0	0	0	0
OTU:1:1116:16668:7002	24	0	0	0	0	0	0	0	0	0	0	0	0	0	0	0	0	0	0	24	0		0	0	0	0	0	0	0	0	0
OTU:1:1101:7672:8625	24	0	0	0	0	0	0	0	0	0	0	0	0	0	0	0	0	0	24	0	0		0	0	0	0	0	0	0	0	0
OTU:1:1102:2558:15663	24	0	12	0	0	0	0	0	0	0	0	0	0	0	0	0	0	0	0	12	0		0	0	0	0	0	0	0	0	0
OTU:1:1102:8093:9344	24	0	0	0	0	0	0	0	0	0	0	0	0	0	0	0	0	0	0	24	0		0	0	0	0	0	0	0	0	0
OTU:1:1101:25007:20234	24	0	0	0	0	0	0	0	0	0	0	0	0	15	9	0	0	0	0	0	0		0	0	0	0	0	0	0	0	0
OTU:1:1102:14353:6707	23	0	0	0	0	0	0	0	0	0	0	0	0	0	0	0	0	23	0	0	0		0	0	0	0	0	0	0	0	0
OTU:1:1104:12705:12946	23	0	0	0	0	0	0	0	0	0	0	0	0	0	0	0	0	23	0	0	0		0	0	0	0	0	0	0	0	0
OTU:1:1105:28601:10534	23	0	0	0	0	0	0	0	0	0	23	0	0	0	0	0	0	0	0	0	0		0	0	0	0	0	0	0	0	0
OTU:1:1107:21331:24143	23	0	0	0	0	0	0	0	0	0	0	0	0	0	0	0	0	23	0	0	0		0	0	0	0	0	0	0	0	0
OTU:1:1104:10900:21769	23	0	0	0	0	0	0	0	0	0	0	0	0	0	4	0	0	0	0	19	0		0	0	0	0	0	0	0	0	0
OTU:1:1115:7914:19131	23	0	0	0	0	0	0	0	0	0	0	0	0	15	8	0	0	0	0	0	0		0	0	0	0	0	0	0	0	0
OTU:1:1103:25505:5465	23	0	0	0	0	0	0	0	0	0	0	0	0	12	11	0	0	0	0	0	0		0	0	0	0	0	0	0	0	0
OTU:1:1104:17946:18103	23	0	0	0	0	0	0	0	0	0	0	0	0	0	19	0	0	0	2	2	0		0	0	0	0	0	0	0	0	0
OTU:1:1111:21892:3094	23	0	0	0	0	0	0	0	0	0	0	0	0	4	14	3	0	0	0	2	0		0	0	0	0	0	0	0	0	0
OTU:1:1101:13715:22627	23	0	0	0	0	0	0	0	0	0	0	0	0	10	7	6	0	0	0	0	0		0	0	0	0	0	0	0	0	0
OTU:1:1115:11014:14742	22	0	15	0	0	0	0	0	0	0	0	0	0	0	0	0	0	3	4	0	0		0	0	0	0	0	0	0	0	0
OTU:1:1102:4151:16065	22	0	0	0	0	0	0	0	0	0	0	0	0	0	0	0	0	22	0	0	0		0	0	0	0	0	0	0	0	0
OTU:1:1114:8114:5796	22	0	0	0	0	0	0	0	0	22	0	0	0	0	0	0	0	0	0	0	0		0	0	0	0	0	0	0	0	0
OTU:1:1102:11604:17911	22	0	0	0	0	0	0	0	0	0	0	0	0	14	6	0	0	0	0	2	0		0	0	0	0	0	0	0	0	0
OTU:1:1112:21836:20879	22	0	0	0	0	0	0	0	0	0	0	0	0	12	10	0	0	0	0	0	0		0	0	0	0	0	0	0	0	0
OTU:1:1102:26990:16979	21	0	0	0	0	0	0	0	0	0	0	0	0	0	0	0	0	21	0	0	0		0	0	0	0	0	0	0	0	0
OTU:1:1103:9354:20192	21	0	0	0	0	0	0	0	0	0	0	0	0	0	0	0	0	0	21	0	0		0	0	0	0	0	0	0	0	0
OTU:1:1101:5896:7001	21	0	0	0	0	0	0	0	0	0	0	0	0	0	0	0	0	0	0	21	0		0	0	0	0	0	0	0	0	0
OTU:1:1118:23927:11075	21	0	0	0	0	5	13	0	0	0	0	0	0	0	0	0	0	3	0	0	0		0	0	0	0	0	0	0	0	0
OTU:1:1116:18526:11225	21	0	0	0	0	0	0	0	0	0	0	0	0	5	6	6	0	0	0	4	0		0	0	0	0	0	0	0	0	0
OTU:1:1101:13119:13576	21	0	0	0	0	0	0	0	0	0	0	0	0	3	3	9	0	0	0	6	0		0	0	0	0	0	0	0	0	0
OTU:1:1107:21867:17292	20	0	0	0	0	0	0	0	0	0	0	0	0	3	17	0	0	0	0	0	0		0	0	0	0	0	0	0	0	0
OTU:1:1118:24105:7087	20	0	0	0	0	0	0	0	0	0	0	0	0	11	7	2	0	0	0	0	0		0	0	0	0	0	0	0	0	0
OTU:1:1103:23765:23496	19	0	0	0	0	0	0	0	0	0	0	0	9	0	0	0	0	0	0	0	10		0	0	0	0	0	0	0	0	0
OTU:1:2115:12498:16286	19	0	0	0	0	0	0	0	0	3	16	0	0	0	0	0	0	0	0	0	0		0	0	0	0	0	0	0	0	0
OTU:1:1101:26512:19844	19	0	0	0	0	0	0	0	0	0	0	0	0	0	0	0	15	0	4	0	0		0	0	0	0	0	0	0	0	0
OTU:1:1107:8220:21165	19	0	0	0	0	0	0	0	0	19	0	0	0	0	0	0	0	0	0	0	0		0	0	0	0	0	0	0	0	0
OTU:1:1115:7287:12148	19	0	0	0	0	0	0	0	0	19	0	0	0	0	0	0	0	0	0	0	0		0	0	0	0	0	0	0	0	0
OTU:1:2108:24013:10655	19	0	0	0	0	0	0	0	0	0	0	0	0	0	0	0	0	0	0	19	0		0	0	0	0	0	0	0	0	0
OTU:1:2110:18571:17028	19	0	0	0	0	0	0	0	0	0	0	0	0	0	0	0	8	0	11	0	0		0	0	0	0	0	0	0	0	0
OTU:1:1105:7877:23252	19	0	0	0	0	0	0	0	0	0	0	0	0	12	7	0	0	0	0	0	0		0	0	0	0	0	0	0	0	0
OTU:1:2107:13741:6918	18	0	0	0	0	0	0	0	0	0	0	0	0	0	0	0	0	0	18	0	0		4	2	0	1	1	3	2	1	0
OTU:1:2111:7855:18575	18	0	0	0	0	0	0	0	0	18	0	0	0	0	0	0	0	0	0	0	0		0	0	0	0	0	0	0	0	0
OTU:1:1107:7564:20109	18	0	0	0	0	0	0	0	0	18	0	0	0	0	0	0	0	0	0	0	0		0	0	0	0	0	0	0	0	0
OTU:1:1109:19252:14807	18	0	0	0	0	0	0	0	0	0	0	0	0	0	0	0	0	0	0	18	0		0	0	0	0	0	0	0	0	0
OTU:1:1112:25315:6990	18	0	0	0	0	0	0	0	0	0	0	0	0	0	0	0	0	0	0	18	0		0	0	0	0	0	0	0	0	0
OTU:1:2101:5006:5225	18	0	0	0	0	0	0	0	0	0	0	0	0	11	7	0	0	0	0	0	0		0	0	0	0	0	0	0	0	0
OTU:1:1117:26759:14128	18	0	0	0	0	0	0	0	0	0	0	0	0	4	7	7	0	0	0	0	0		0	0	0	0	0	0	0	0	0
OTU:1:1102:17805:24684	17	0	0	0	0	0	0	0	0	17	0	0	0	0	0	0	0	0	0	0	0		0	0	0	0	0	0	0	0	0
OTU:1:1115:26866:18999	17	0	0	0	0	0	0	0	0	17	0	0	0	0	0	0	0	0	0	0	0		0	0	0	0	0	0	0	0	0
OTU:1:2105:19033:12472	17	0	0	0	0	0	0	0	0	0	0	0	0	0	0	0	0	0	17	0	0		0	0	0	0	0	0	0	0	0
OTU:1:2109:23399:7556	17	0	0	0	0	0	0	0	0	0	0	0	0	0	0	0	0	17	0	0	0		0	0	0	0	0	0	0	0	0
OTU:1:1103:17043:23509	17	0	0	0	0	0	0	0	0	0	0	0	0	13	4	0	0	0	0	0	0		0	0	0	0	0	0	0	0	0
OTU:1:1110:8301:5511	17	0	0	0	0	0	0	0	0	0	0	0	0	12	5	0	0	0	0	0	0		0	0	0	0	0	0	0	0	0
OTU:1:2105:3883:17891	17	0	0	0	0	0	0	0	0	0	0	0	0	11	6	0	0	0	0	0	0		0	0	0	0	0	0	0	0	0
OTU:1:1108:26968:5745	17	0	0	0	0	0	0	0	0	0	0	0	0	7	8	0	0	0	0	2	0		0	0	0	0	0	0	0	0	0
OTU:1:2105:19512:22710	17	0	0	0	0	0	0	0	0	2	0	0	0	5	10	0	0	0	0	0	0		0	0	0	0	0	0	0	0	0
OTU:1:1102:20195:23185	17	0	0	0	0	0	0	0	0	0	0	0	0	6	11	0	0	0	0	0	0		0	0	0	0	0	0	0	0	0
OTU:1:1104:11007:10423	17	0	0	0	0	0	0	0	0	0	0	0	0	5	2	6	0	0	0	4	0		0	0	0	0	0	0	0	0	0
OTU:1:2104:15081:8545	16	0	0	0	0	0	0	0	0	2	14	0	0	0	0	0	0	0	0	0	0		0	0	0	0	0	0	0	0	0
OTU:1:1101:9078:13042	16	0	2	0	0	0	0	0	0	0	0	0	0	0	0	0	0	0	0	14	0		0	0	0	0	0	0	0	0	0
OTU:1:1101:9801:23348	16	0	0	0	0	0	0	0	0	0	0	0	0	0	0	0	0	16	0	0	0		0	0	0	0	0	0	0	0	0
OTU:1:1114:15946:13236	16	0	0	0	0	0	0	0	0	0	0	0	0	5	0	0	0	0	0	11	0		0	0	0	0	0	0	0	0	0
OTU:1:2101:14411:14619	16	0	0	0	0	0	0	0	0	0	0	0	0	0	0	0	0	16	0	0	0		0	0	0	0	0	0	0	0	0
OTU:1:2111:6496:17873	16	0	0	0	0	0	0	0	0	0	0	0	7	0	0	0	0	0	0	0	9		0	0	0	0	0	0	0	0	0
OTU:1:1101:7946:2102	16	0	0	0	0	0	0	0	0	10	0	0	0	0	6	0	0	0	0	0	0		0	0	0	0	0	1	0	0	0
OTU:1:1109:26200:6512	16	0	0	0	0	0	0	0	0	0	0	0	0	7	9	0	0	0	0	0	0		0	0	0	0	0	0	0	0	0
OTU:1:2105:18185:19197	15	0	0	0	0	0	0	0	0	0	0	0	2	0	0	0	8	0	5	0	0		0	0	0	0	0	0	0	0	0
OTU:1:1103:23087:17130	15	0	0	0	0	0	0	0	0	0	0	0	0	0	0	0	0	0	0	15	0		0	0	0	0	0	0	0	0	0
OTU:1:1106:13583:20277	15	0	0	0	0	0	0	0	0	0	0	0	0	0	0	0	0	0	15	0	0		0	0	0	0	0	0	0	0	0
OTU:1:1104:17978:11620	15	0	0	0	0	0	0	0	0	15	0	0	0	0	0	0	0	0	0	0	0		0	0	0	0	0	0	0	0	0
OTU:1:2110:26652:21538	15	0	0	0	0	0	0	0	0	6	9	0	0	0	0	0	0	0	0	0	0		0	0	0	0	0	0	0	0	0
OTU:1:1101:12231:6936	15	0	0	0	0	0	0	0	0	0	0	0	0	13	2	0	0	0	0	0	0		0	0	0	0	0	0	0	0	0
OTU:1:1110:27909:8452	15	0	0	0	0	0	0	0	0	0	0	0	0	10	5	0	0	0	0	0	0		0	0	0	0	0	0	0	0	0
OTU:1:1101:8937:20276	15	0	0	0	0	0	0	0	0	0	0	0	0	5	4	0	0	0	0	6	0		0	0	0	0	0	0	0	0	0
OTU:1:1106:15139:2849	15	0	0	0	0	0	0	0	0	0	0	0	0	11	4	0	0	0	0	0	0		0	0	0	0	0	0	0	0	0
OTU:1:2109:18275:11377	15	0	0	0	0	0	0	0	0	0	0	0	0	5	7	3	0	0	0	0	0		0	0	0	0	0	0	0	0	0
OTU:1:2109:10861:18816	14	0	0	0	0	0	0	0	0	0	0	0	0	0	0	0	0	0	14	0	0		0	0	0	0	0	0	0	0	0
OTU:1:1109:27152:5923	14	0	0	0	0	0	0	0	0	0	0	0	5	0	0	0	0	0	0	2	7		0	0	0	0	0	0	0	0	0
OTU:1:1101:13741:9677	14	0	0	0	0	0	0	0	0	0	0	0	0	0	0	0	0	0	0	14	0		0	0	0	0	0	0	0	0	0
OTU:1:1103:13871:8359	14	0	0	0	0	0	0	0	0	0	0	0	0	0	0	0	0	14	0	0	0		0	0	0	0	0	0	0	0	0
OTU:1:1108:27347:17930	14	0	0	0	0	0	0	0	0	2	12	0	0	0	0	0	0	0	0	0	0		0	0	0	0	0	0	0	0	0
OTU:1:1106:9229:4295	14	0	12	0	0	0	0	0	0	0	0	0	2	0	0	0	0	0	0	0	0		0	0	0	0	0	0	0	0	0
OTU:1:1107:8795:24819	14	0	0	0	0	0	0	0	0	0	0	0	0	0	0	0	11	0	3	0	0		0	0	0	0	0	0	0	0	0
OTU:1:1111:26222:20842	14	0	0	0	0	0	0	0	0	0	0	0	0	0	0	0	0	2	12	0	0		0	0	0	0	0	0	0	0	0
OTU:1:2116:17180:19445	14	0	0	0	0	0	0	0	0	0	0	0	0	0	0	0	0	14	0	0	0		0	0	0	0	0	0	0	0	0
OTU:1:1109:28683:13878	14	0	0	0	0	0	0	0	0	0	0	0	0	8	3	0	0	0	0	3	0		0	0	0	0	0	0	0	0	0
OTU:1:1119:15136:7832	14	0	0	0	0	0	0	0	0	0	0	0	0	6	8	0	0	0	0	0	0		0	0	0	0	0	0	0	0	0
OTU:1:1102:26718:21319	13	0	0	0	0	0	11	2	0	0	0	0	0	0	0	0	0	0	0	0	0		0	0	0	0	0	0	0	0	0
OTU:1:1101:25617:21699	13	0	0	0	0	0	0	0	0	0	0	0	0	0	0	0	0	13	0	0	0		0	0	0	0	0	0	0	0	0
OTU:1:1101:13971:8407	13	0	0	0	0	0	0	0	0	0	0	0	0	0	0	0	0	0	13	0	0		0	0	0	0	0	0	0	0	0
OTU:1:2110:26651:14562	13	0	0	0	0	0	0	0	0	13	0	0	0	0	0	0	0	0	0	0	0		0	0	0	0	0	0	0	0	0
OTU:1:2112:9005:9904	13	0	0	0	0	0	0	0	0	0	0	0	0	10	3	0	0	0	0	0	0		0	0	0	0	0	0	0	0	0
OTU:1:1102:11650:18221	13	0	0	0	0	0	0	0	0	0	0	0	0	4	6	0	0	0	0	3	0		0	0	0	0	0	0	0	0	0
OTU:1:1101:19111:20284	13	0	0	0	0	0	0	0	0	0	0	0	0	8	5	0	0	0	0	0	0		0	0	0	0	0	0	0	0	0
OTU:1:1106:17509:14428	13	0	0	0	0	0	0	0	0	7	0	0	0	0	6	0	0	0	0	0	0		0	0	0	0	0	0	0	0	0
OTU:1:2109:26671:21551	13	0	0	0	0	0	0	0	0	0	0	0	0	5	8	0	0	0	0	0	0		0	0	0	0	0	0	0	0	0
OTU:1:1107:17902:9916	13	0	0	0	0	0	0	0	0	0	0	0	0	2	0	2	0	0	0	9	0		0	0	0	0	0	0	0	0	0
OTU:1:1116:14047:15664	12	0	0	0	0	0	0	0	0	0	0	0	0	0	0	0	0	0	12	0	0		0	0	0	0	0	0	0	0	0
OTU:1:1109:8454:3306	12	0	0	0	0	0	0	0	0	12	0	0	0	0	0	0	0	0	0	0	0		0	0	0	0	0	0	0	0	0
OTU:1:1111:25198:11067	12	0	0	0	0	0	0	0	0	0	0	0	0	0	0	0	0	12	0	0	0		0	0	0	0	0	0	0	0	0
OTU:1:2115:12547:24808	12	0	0	0	0	2	7	0	0	0	0	0	0	0	0	0	0	3	0	0	0		0	0	0	0	0	0	0	0	0
OTU:1:1103:23114:20278	12	0	0	0	0	0	0	0	0	12	0	0	0	0	0	0	0	0	0	0	0		0	0	0	0	0	0	0	0	0
OTU:1:1103:7187:9065	12	0	0	0	0	0	0	0	0	0	0	0	0	0	0	0	10	0	2	0	0		0	0	0	0	0	0	0	0	0
OTU:1:1110:27237:5918	12	0	0	0	0	0	0	0	0	0	0	0	0	0	0	0	8	0	4	0	0		0	0	0	0	0	0	0	0	0
OTU:1:2105:2870:18073	12	0	0	0	0	0	0	0	0	0	12	0	0	0	0	0	0	0	0	0	0		0	0	0	0	0	0	0	0	0
OTU:1:2116:14438:14757	12	0	0	0	0	0	0	0	0	0	0	0	0	7	5	0	0	0	0	0	0		0	0	0	0	0	0	0	0	0
OTU:1:1107:22219:5554	12	0	0	0	0	0	0	0	0	0	0	0	0	8	4	0	0	0	0	0	0		0	0	0	0	0	0	0	0	0
OTU:1:1104:3899:9402	12	0	0	0	0	0	0	0	0	0	0	0	0	2	10	0	0	0	0	0	0		0	0	0	0	0	0	0	0	0
OTU:1:2107:5216:7748	11	2	0	0	0	0	0	0	0	0	0	0	4	0	0	0	0	0	0	0	5		0	0	0	0	0	0	0	0	0
OTU:1:1112:28726:9541	11	0	0	0	0	0	0	0	0	0	0	0	0	0	0	0	2	0	9	0	0		0	0	0	0	0	0	0	0	0
OTU:1:1103:14176:14093	11	0	0	0	0	0	0	0	0	0	0	0	0	0	0	0	0	0	0	11	0		0	0	0	0	0	0	0	0	0
OTU:1:1105:10497:20780	11	0	0	0	0	0	0	0	0	0	0	0	0	0	0	0	0	0	11	0	0		0	0	0	0	0	0	0	0	0
OTU:1:1111:7787:1922	11	0	0	0	0	0	0	0	0	0	0	0	0	0	0	0	0	0	11	0	0		0	0	0	0	0	0	0	0	0
OTU:1:1112:18612:22124	11	0	0	0	0	0	0	0	0	0	0	0	0	6	2	0	0	0	0	3	0		0	0	0	0	0	0	0	0	0
OTU:1:1106:25203:19857	11	0	0	0	0	0	0	0	0	0	0	0	0	3	8	0	0	0	0	0	0		0	0	0	0	0	0	0	0	0
OTU:1:2119:6345:23232	11	0	0	0	0	0	0	0	0	0	0	0	0	3	8	0	0	0	0	0	0		0	0	0	0	0	0	0	0	0
OTU:1:1101:11405:20405	10	0	0	0	0	2	8	0	0	0	0	0	0	0	0	0	0	0	0	0	0		0	0	0	0	0	0	0	0	0
OTU:1:2115:12997:16371	10	0	0	0	0	0	0	0	0	0	0	0	0	0	0	0	0	0	0	10	0		0	0	0	0	0	0	0	0	0
OTU:1:1117:15549:21820	10	0	0	0	0	0	0	0	0	0	0	0	0	0	0	0	0	0	10	0	0		0	0	0	0	0	0	0	0	0
OTU:1:1101:10501:14455	10	0	0	0	0	0	0	0	0	0	0	0	0	0	0	0	0	0	10	0	0		0	0	0	0	0	0	0	0	0
OTU:1:2102:6794:12180	10	0	0	0	0	0	0	0	0	0	0	0	0	0	0	0	0	10	0	0	0		0	0	0	0	0	0	0	0	0
OTU:1:2116:19888:9083	10	0	0	0	0	0	0	0	0	0	0	0	0	7	3	0	0	0	0	0	0		0	0	0	0	0	0	0	0	0
OTU:1:1101:5510:8397	10	0	0	0	0	0	0	0	0	8	0	0	0	0	2	0	0	0	0	0	0		0	0	0	0	0	0	0	0	0
OTU:1:1116:23573:5581	10	0	0	0	0	0	0	0	0	0	0	0	0	0	5	0	0	0	0	5	0		0	0	0	0	0	0	0	0	0
OTU:1:1102:13035:9612	10	0	0	0	0	0	0	0	0	0	0	0	0	6	4	0	0	0	0	0	0		0	0	0	0	0	0	0	0	0
OTU:1:1106:12428:19142	10	0	0	0	0	0	0	0	0	2	0	0	0	3	5	0	0	0	0	0	0		0	0	0	0	0	0	0	0	0
OTU:1:2113:25099:19689	10	0	0	0	0	0	0	0	0	0	0	0	0	5	5	0	0	0	0	0	0		0	0	0	0	0	0	0	0	0
OTU:1:1111:4865:12374	9	0	0	0	0	0	0	0	0	0	0	0	0	0	0	0	0	9	0	0	0		0	0	0	0	0	0	0	0	0
OTU:1:2115:8009:23134	9	0	0	0	0	0	7	2	0	0	0	0	0	0	0	0	0	0	0	0	0		0	0	0	0	0	0	0	0	0
OTU:1:1114:22641:13245	9	0	0	0	0	0	0	0	0	9	0	0	0	0	0	0	0	0	0	0	0		0	0	0	0	0	0	0	0	0
OTU:1:1108:17126:16609	9	0	0	0	0	0	0	0	0	9	0	0	0	0	0	0	0	0	0	0	0		0	0	0	0	0	0	0	0	0
OTU:1:1101:25328:18116	9	0	0	0	0	0	0	0	0	0	0	0	0	0	0	0	0	9	0	0	0		0	0	0	0	0	0	0	0	0
OTU:1:1105:20848:11557	9	0	0	0	0	0	0	0	0	0	0	0	0	2	7	0	0	0	0	0	0		0	0	0	0	0	0	0	0	0
OTU:1:1103:10330:13138	8	0	6	0	0	0	0	0	0	0	0	0	2	0	0	0	0	0	0	0	0		0	0	0	0	0	0	0	0	0
OTU:1:1106:2785:11842	8	0	0	0	0	0	0	0	0	8	0	0	0	0	0	0	0	0	0	0	0		0	0	0	0	0	0	0	0	0
OTU:1:1108:4585:21350	8	0	0	0	0	0	0	0	0	0	0	0	0	0	0	0	0	8	0	0	0		0	0	0	0	0	0	0	0	0
OTU:1:1111:13016:9847	8	0	0	0	0	0	0	0	0	0	0	0	0	0	0	0	0	0	8	0	0		0	0	0	0	0	0	0	0	0
OTU:1:1111:28683:9567	8	0	0	0	0	0	0	0	0	0	0	0	0	0	0	0	0	0	0	0	8		0	0	0	0	0	0	0	0	0
OTU:1:1112:27449:5883	7	2	2	0	0	0	0	0	0	0	0	0	0	0	0	0	0	0	0	0	3		0	0	0	0	0	0	0	0	0
OTU:1:1107:9857:23761	7	0	0	0	0	0	0	0	0	7	0	0	0	0	0	0	0	0	0	0	0		0	0	0	0	0	0	0	0	0
OTU:1:1101:3281:9944	7	0	0	0	0	0	0	0	0	0	0	0	0	0	7	0	0	0	0	0	0		0	0	0	0	0	0	0	0	0
OTU:1:1103:6630:18419	5	0	0	0	0	0	0	0	0	0	0	0	0	0	0	0	0	0	0	0	5		0	0	0	0	0	0	0	0	0
OTU:1:1103:10926:10170	5	0	0	0	0	0	0	0	0	0	0	0	2	0	0	0	0	0	0	0	3		0	0	0	0	0	0	0	0	0
OTU:1:1108:21277:10173	5	0	0	0	0	0	0	0	0	0	0	0	0	0	0	0	0	5	0	0	0		0	0	0	0	0	0	0	0	0
OTU:1:2106:28301:7804	5	0	0	0	0	0	0	0	0	5	0	0	0	0	0	0	0	0	0	0	0		0	0	0	0	0	0	0	0	0
OTU:1:1112:4100:10900	5	0	0	0	0	0	0	0	0	0	0	0	0	0	0	0	0	0	5	0	0		0	0	0	0	0	0	0	0	0
OTU:1:2111:10694:18987	4	0	0	0	0	0	0	0	0	0	0	0	0	0	4	0	0	0	0	0	0		0	0	0	0	0	0	0	0	0
OTU:1:1106:9054:22621	4	0	0	0	0	0	0	0	0	0	0	0	0	4	0	0	0	0	0	0	0		0	0	0	0	0	0	0	0	0
OTU:1:2108:7111:12007	4	0	0	0	0	0	0	0	0	0	0	0	2	2	0	0	0	0	0	0	0		0	0	0	0	0	0	0	0	0
OTU:1:2102:8039:9466	4	0	0	0	0	0	0	0	0	4	0	0	0	0	0	0	0	0	0	0	0		0	0	0	0	0	0	0	0	0
OTU:1:2105:28827:17787	4	0	0	0	0	0	0	0	0	0	0	0	0	0	0	0	0	4	0	0	0		0	0	0	0	0	0	0	0	0
OTU:1:2114:4409:14322	3	0	0	0	0	0	0	0	0	0	0	0	0	0	0	0	0	3	0	0	0		0	0	0	0	0	0	0	0	0
OTU:1:2109:24787:14884	3	0	0	0	0	0	0	0	0	0	0	0	0	3	0	0	0	0	0	0	0		0	0	0	0	0	0	0	0	0
OTU:1:1101:12347:20489	3	0	0	0	0	0	0	0	0	0	0	0	0	0	0	0	0	0	3	0	0		0	0	0	0	0	0	0	0	0
OTU:1:1103:26722:21297	3	0	0	0	0	0	0	0	0	0	0	0	0	0	3	0	0	0	0	0	0		0	0	0	0	0	0	0	0	0
OTU:1:1112:12730:8213	2	0	2	0	0	0	0	0	0	0	0	0	0	0	0	0	0	0	0	0	0		0	0	0	0	0	0	0	0	0
OTU:1:1112:11089:12027	2	0	0	0	0	0	0	0	0	0	0	0	0	0	0	0	0	2	0	0	0		0	0	0	0	0	0	0	0	0
OTU:1:1114:16720:22564	2	0	0	0	0	0	0	0	0	0	0	0	2	0	0	0	0	0	0	0	0		0	0	0	0	0	0	0	0	0
OTU:1:2102:9414:9964	2	0	0	0	0	0	0	0	0	2	0	0	0	0	0	0	0	0	0	0	0		0	0	0	0	0	0	0	0	0
OTU:1:2103:22553:19899	2	0	0	0	0	0	2	0	0	0	0	0	0	0	0	0	0	0	0	0	0		0	0	0	0	0	0	0	0	0
OTU:1:2110:4290:15318	2	0	0	0	0	0	0	0	0	0	2	0	0	0	0	0	0	0	0	0	0		0	0	0	0	0	0	0	0	0
OTU:1:1117:26960:21132	0	0	0	0	0	0	0	0	0	0	0	0	0	0	0	0	0	0	0	0	0		0	0	0	0	0	0	0	0	0
OTU:1:1108:14801:18773	0	0	0	0	0	0	0	0	0	0	0	0	0	0	0	0	0	0	0	0	0		0	0	0	0	0	0	0	0	0
OTU:1:1102:7301:23158	0	0	0	0	0	0	0	0	0	0	0	0	0	0	0	0	0	0	0	0	0		0	0	0	0	0	0	0	0	0
OTU:1:1107:8877:14791	0	0	0	0	0	0	0	0	0	0	0	0	0	0	0	0	0	0	0	0	0		0	0	0	0	0	0	0	0	0
OTU:1:2106:26710:15595	0	0	0	0	0	0	0	0	0	0	0	0	0	0	0	0	0	0	0	0	0		0	0	0	0	0	0	0	0	0
OTU:1:2110:4991:13715	0	0	0	0	0	0	0	0	0	0	0	0	0	0	0	0	0	0	0	0	0		0	0	0	0	0	0	0	0	0
OTU:1:2116:29255:16448	0	0	0	0	0	0	0	0	0	0	0	0	0	0	0	0	0	0	0	0	0		0	0	0	0	0	0	0	0	0
OTU:1:2117:8007:20066	0	0	0	0	0	0	0	0	0	0	0	0	0	0	0	0	0	0	0	0	0		0	0	0	0	0	0	0	0	0
OTU:1:1118:5546:17410	0	0	0	0	0	0	0	0	0	0	0	0	0	0	0	0	0	0	0	0	0		0	0	0	0	0	0	0	0	0
OTU:1:1116:29466:11724	0	0	0	0	0	0	0	0	0	0	0	0	0	0	0	0	0	0	0	0	0		0	0	0	0	0	0	0	0	0
