# Supplementary material for: An updated genetic marker for detection of Lake Sinai Virus and metagenetic applications
Source: PeerJ journal article supplement (doi:10.7717/peerj.9424), 2020-07-17

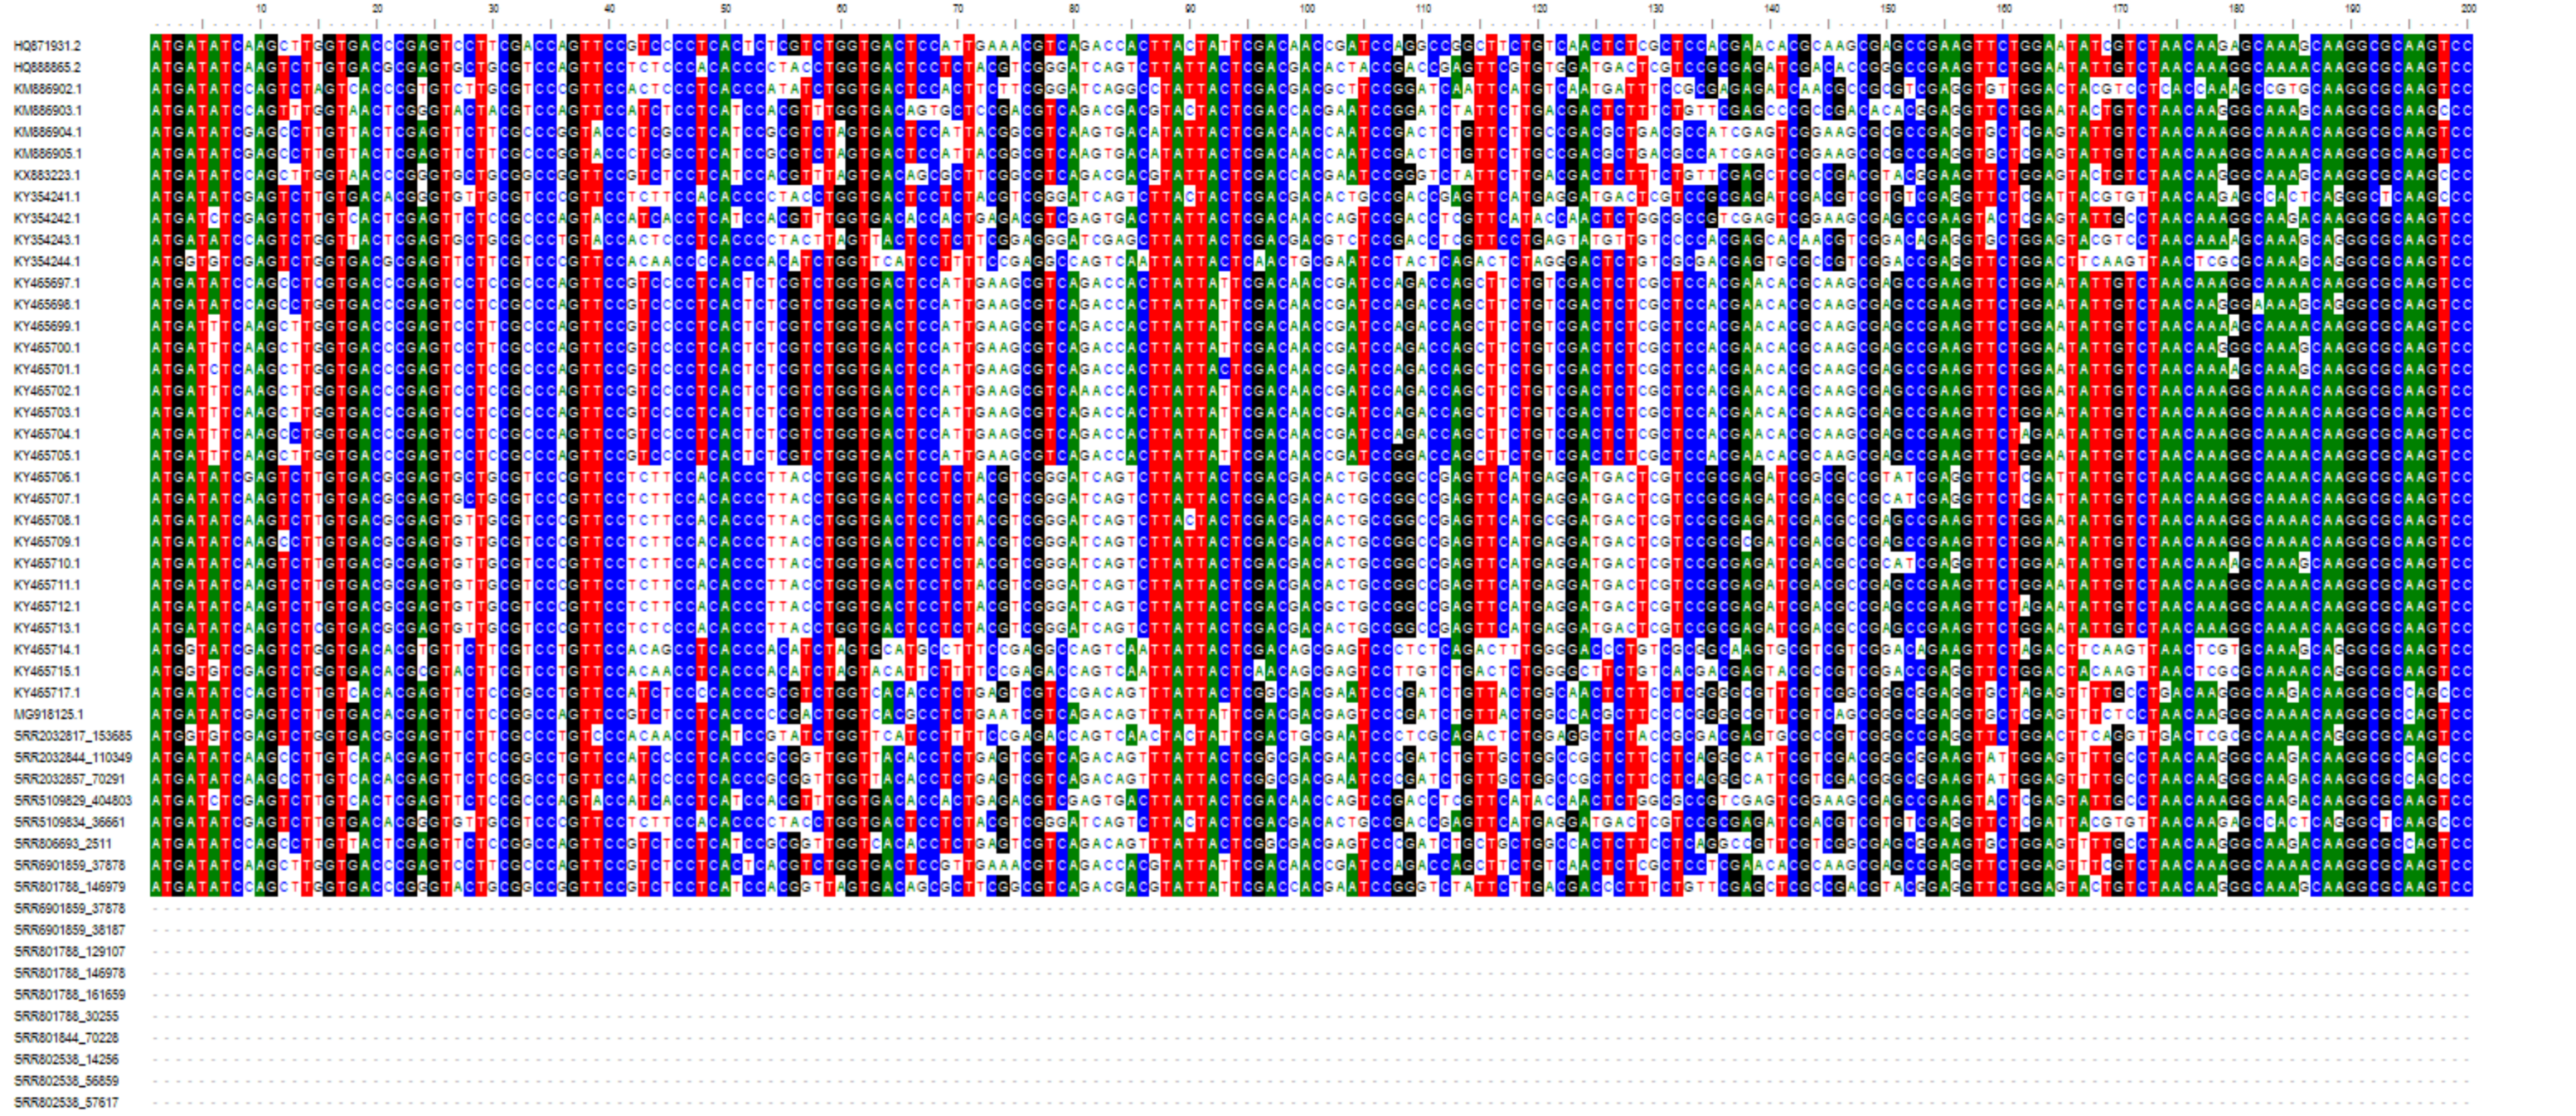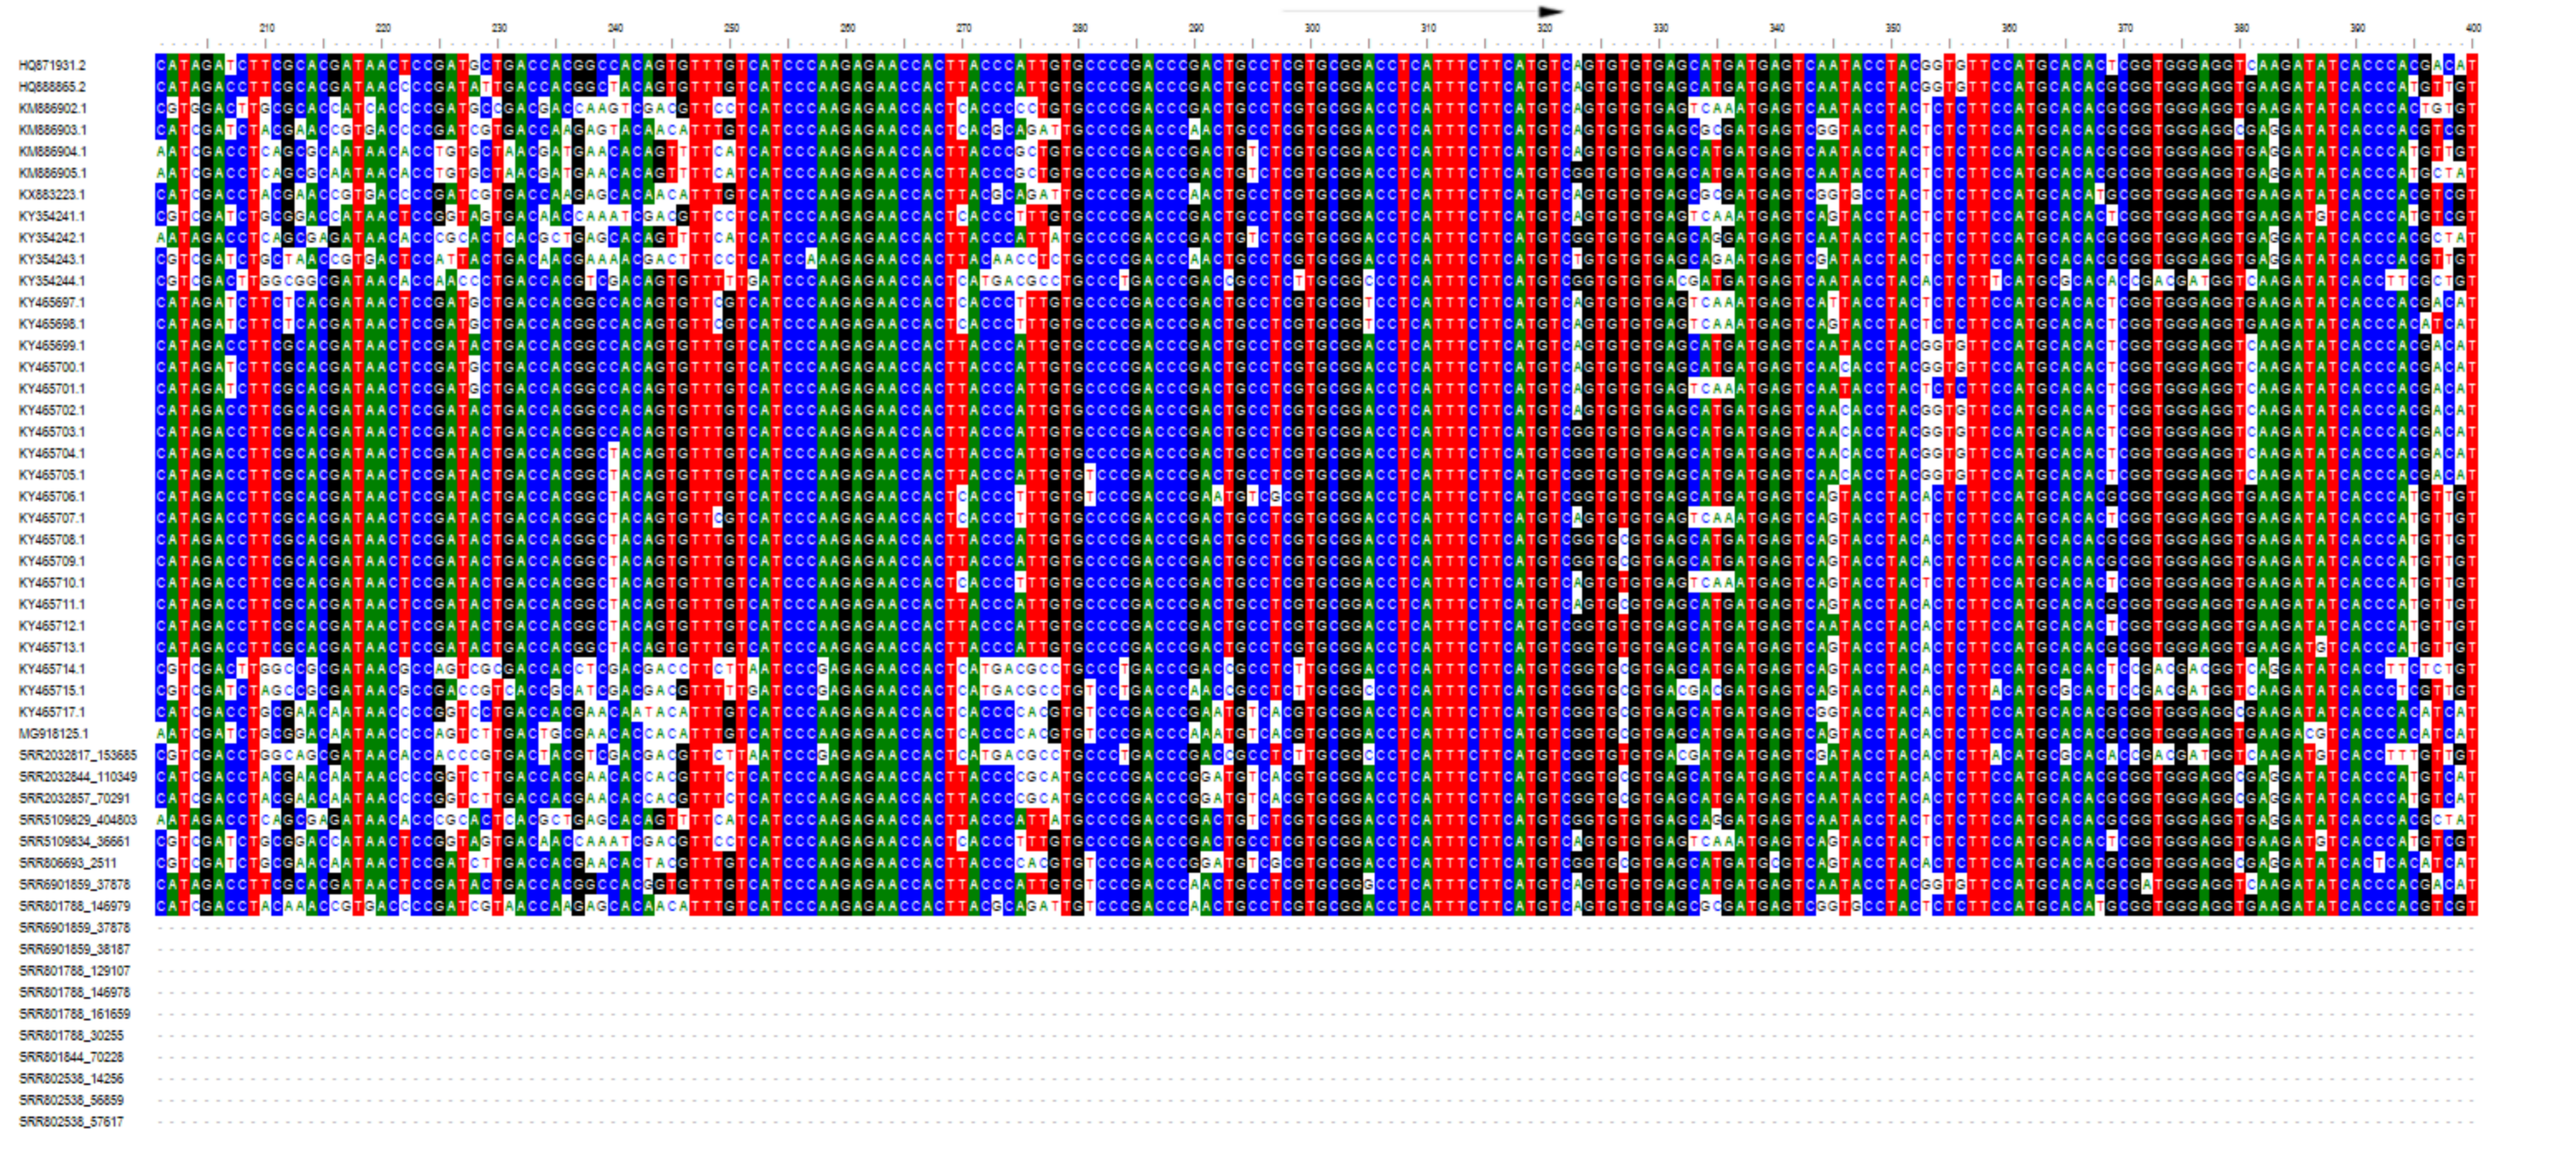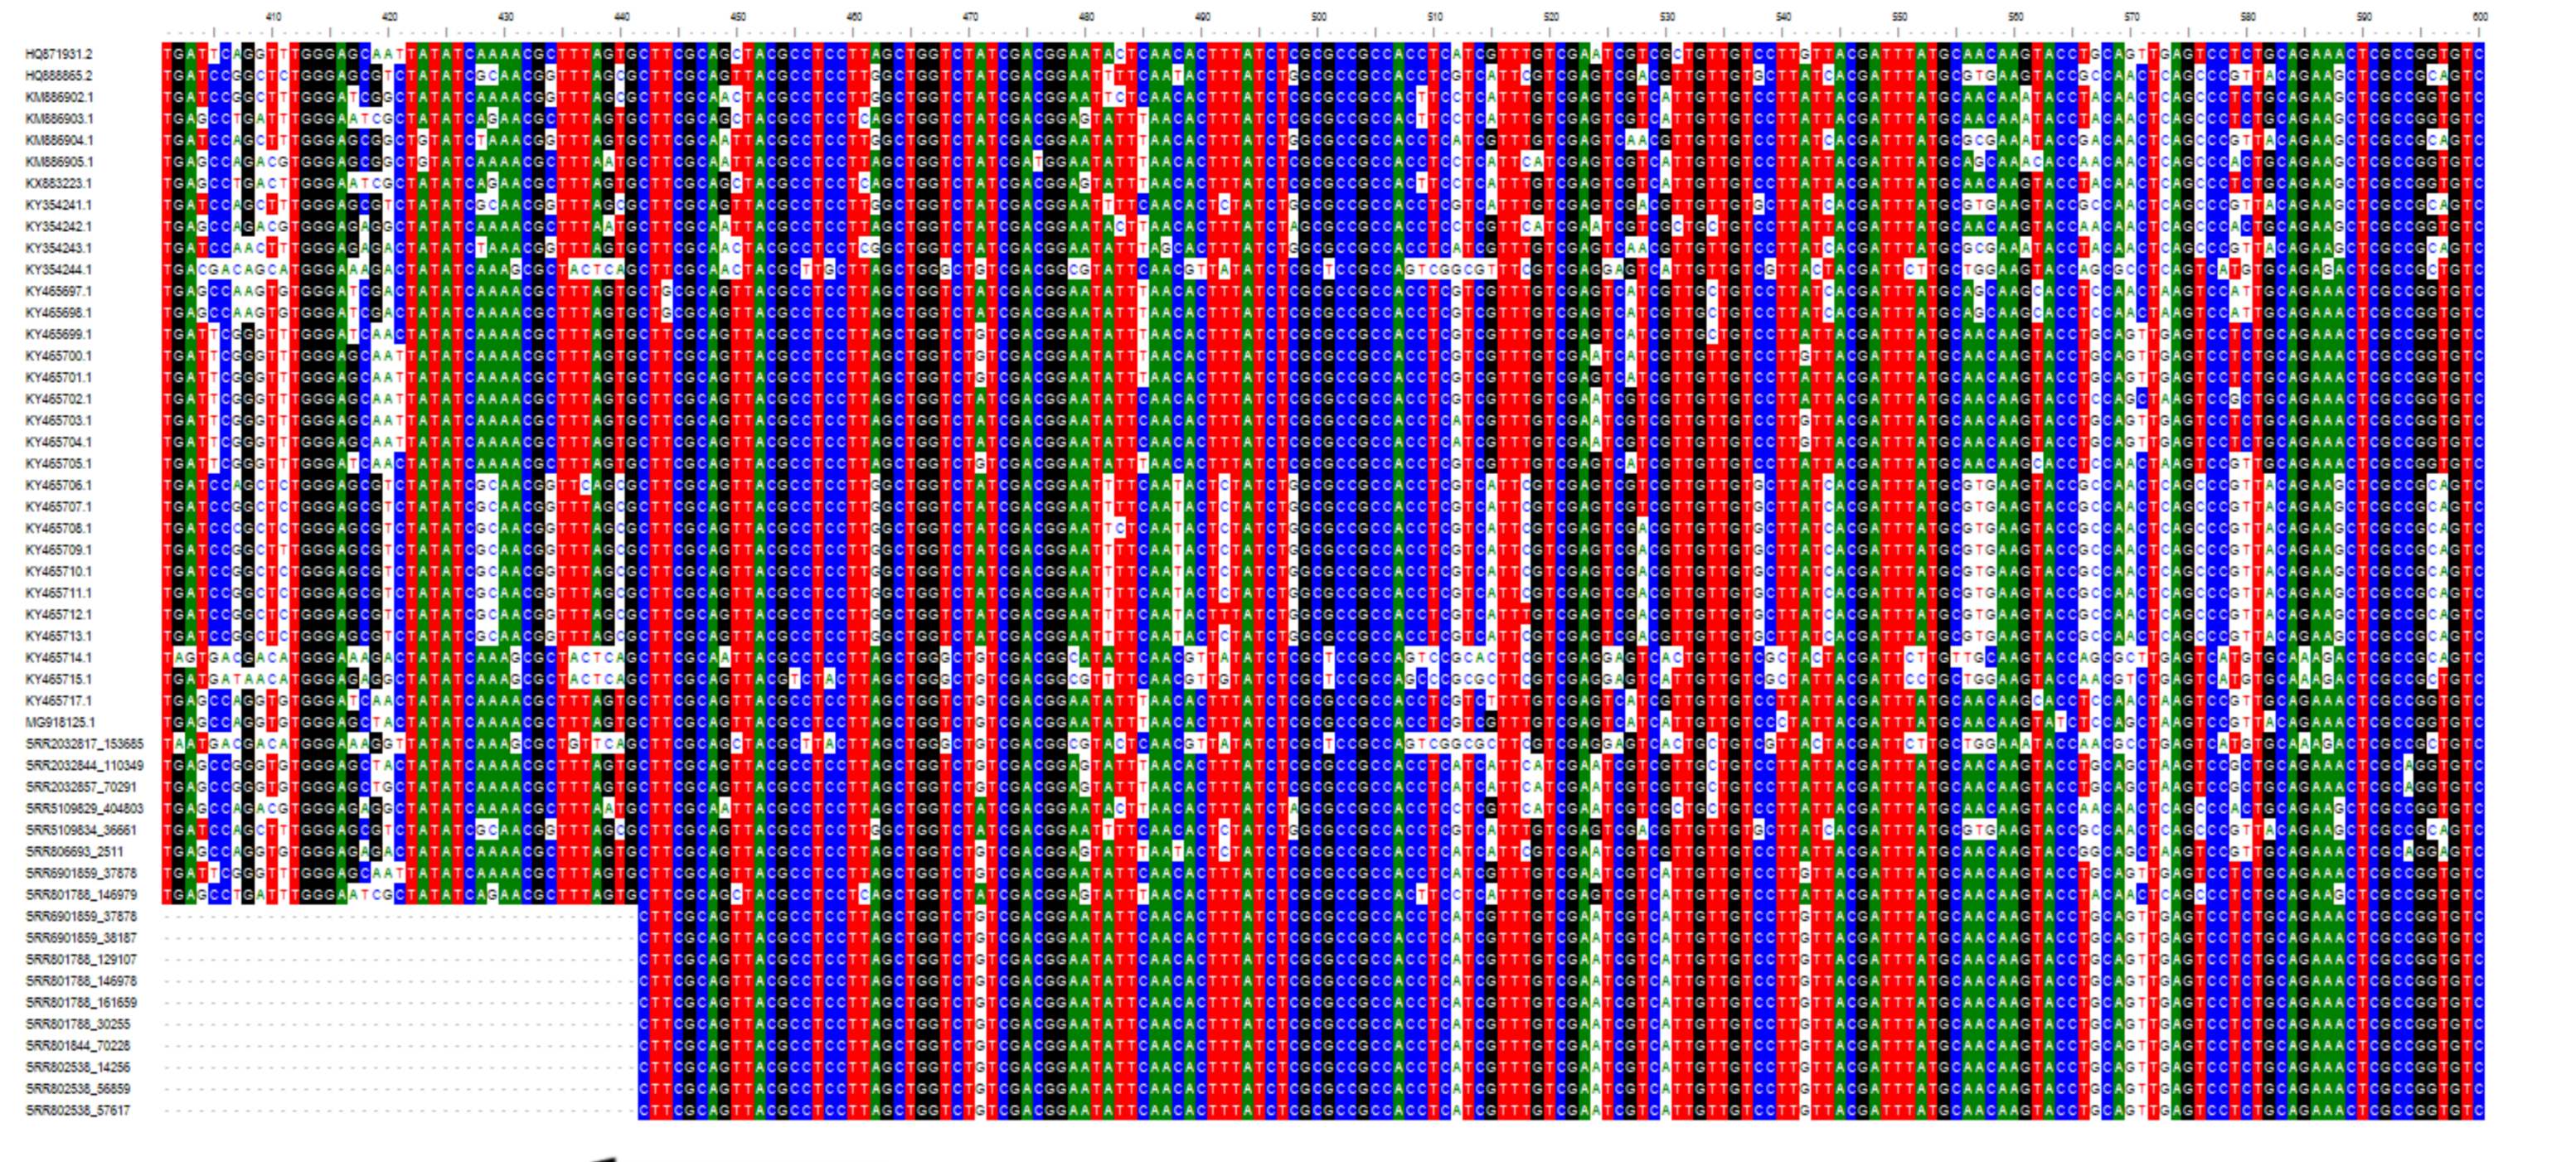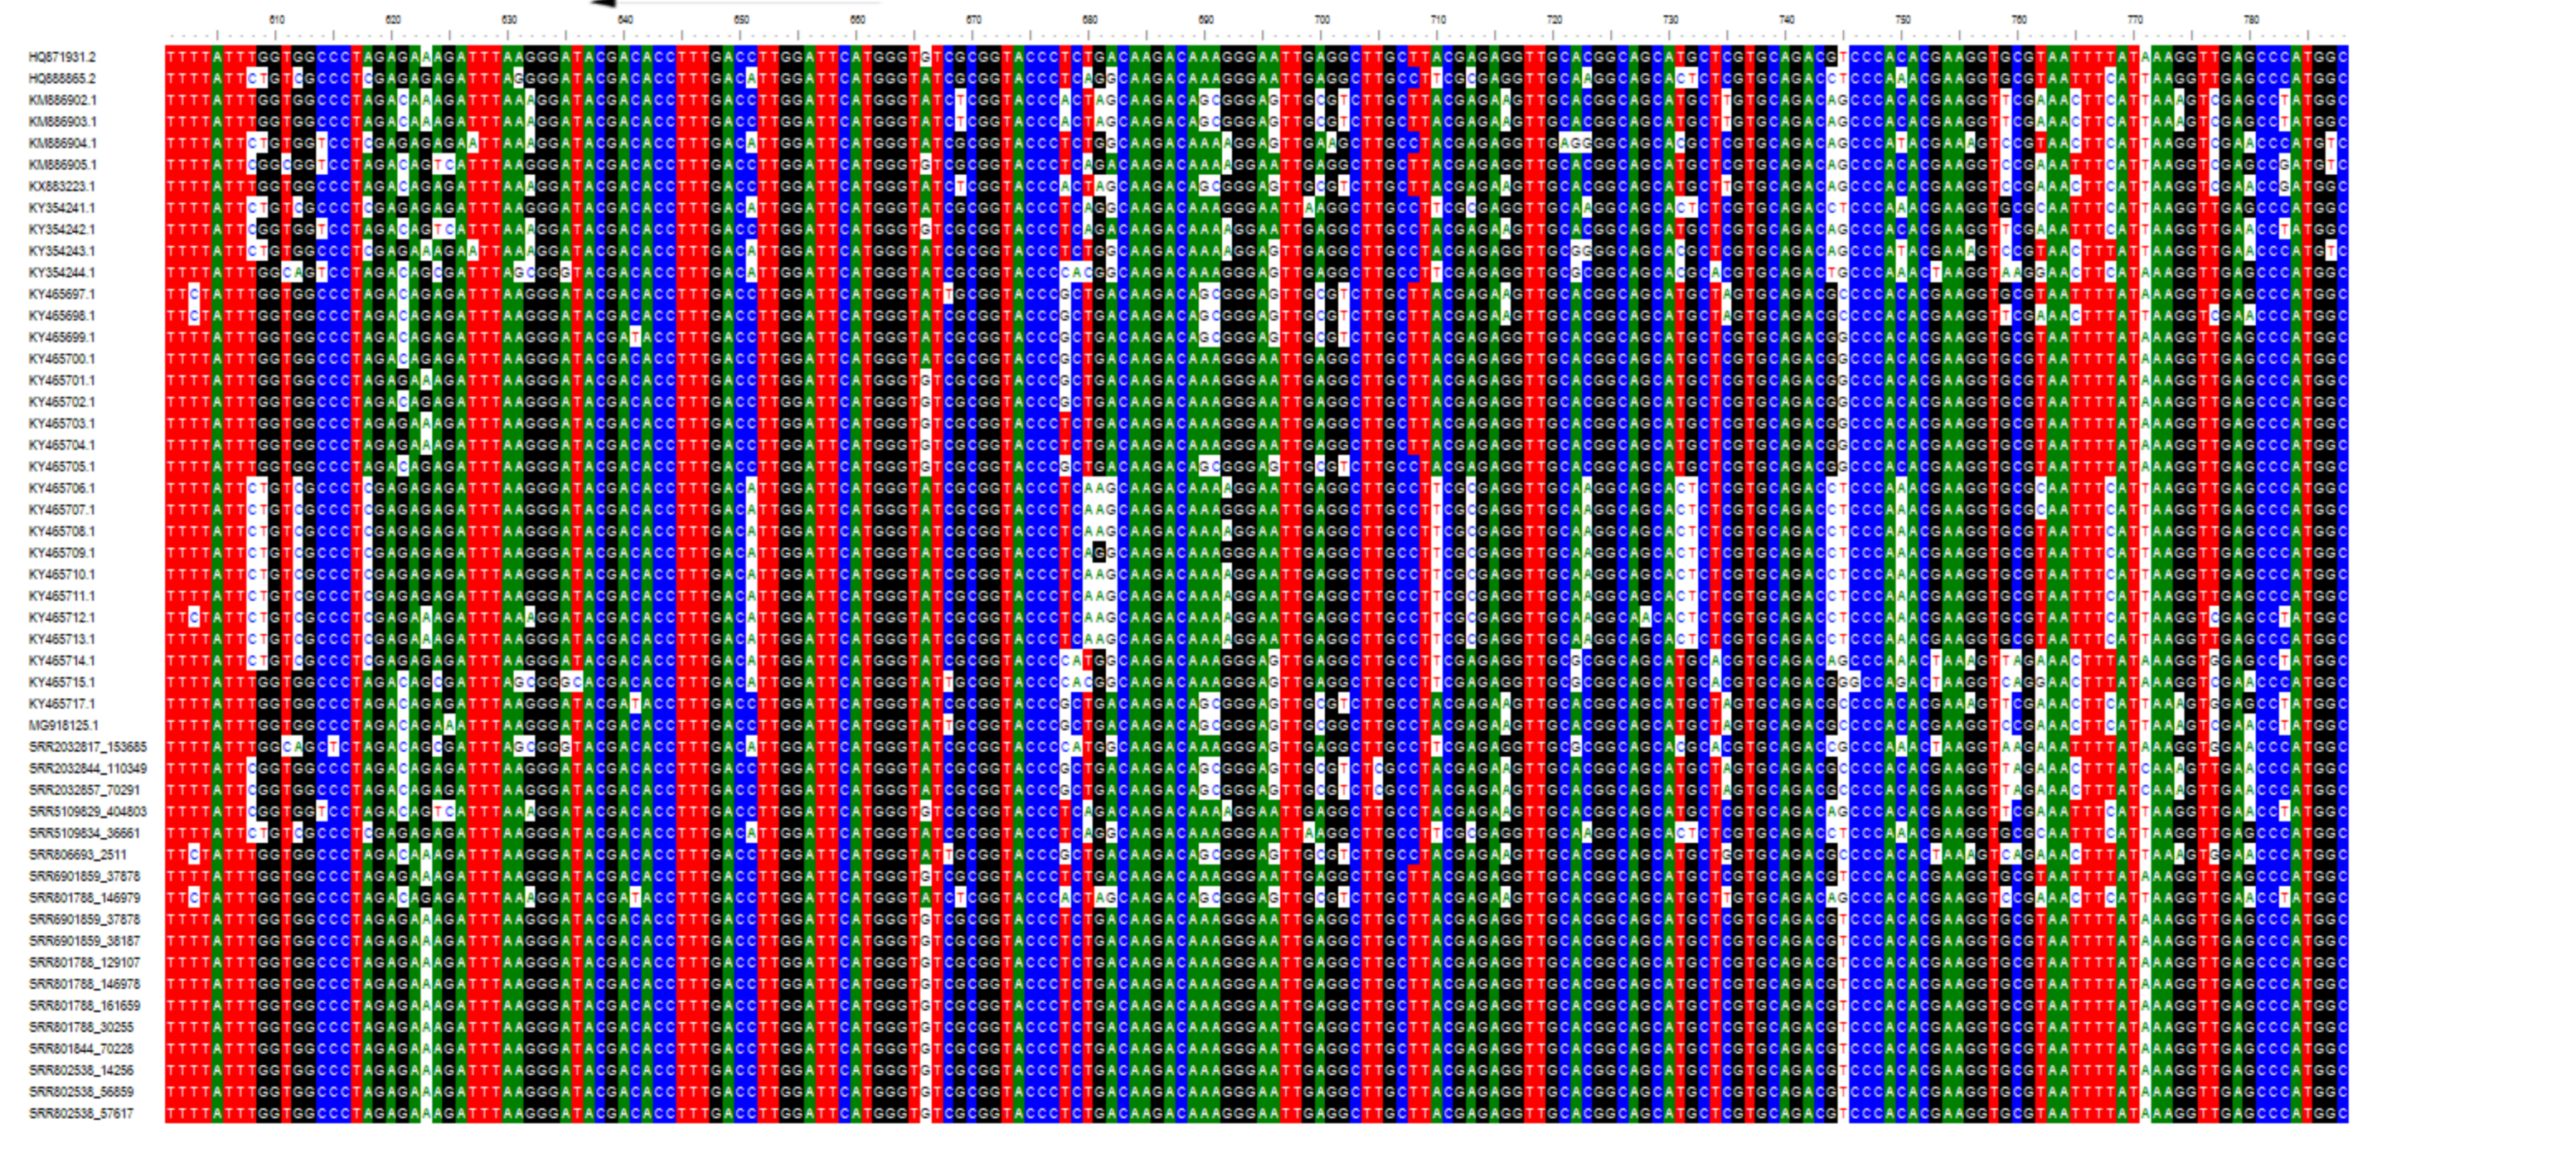

Supplement: now.FileS1.alignment.pdf [file now.FileS1.alignment.pdf]
